# Supplementary material
Source: ML conference proceedings conference paper supplement (https://openreview.net/forum?id=qVMYlK6Joc)
Supplement: supplementary_material [file GIP_ICLR_Final_Submission_with_Supplementary.pdf › gip_code/GIP_ICLR_Final_Submission_with_Supplementary.pdf]

# GREEDY INFORMATION PROJECTION FOR LLM DATA SELECTION

**Anonymous authors**

Paper under double-blind review

## ABSTRACT

We present *Greedy Information Projection* (GIP), a principled framework for choosing training examples for large language model fine-tuning. GIP casts selection as maximizing mutual information between a compact subset of examples and task-specific query signals, which may originate from LLM quality judgments, metadata, or other sources. Under a jointly Gaussian model of data and query embeddings, the objective has a closed form and naturally balances quality and diversity. We show that optimizing this score is equivalent to maximizing the projection of the query embedding matrix onto the span of the selected data, yielding a geometric explanation for the co-emergence of quality and diversity. Building on this view, we develop a fast greedy matching-pursuit procedure with efficient projection-based updates. On instruction-following and mathematical reasoning datasets, GIP selects compact subsets that match full-data fine-tuning while using only a small fraction of examples and compute, unifying quality-aware and diversity-aware selection for efficient fine-tuning.

## 1 INTRODUCTION

A central question in the discussion of large language model (LLM) training is how one should select data. With recent developments of large-scale pretrained language models such as GPT-4 (Achiam et al., 2023), Qwen (Qwen et al., 2025) and Llama (Grattafiori et al., 2024), the community has witnessed models achieving remarkable performance across a broad spectrum of natural-language tasks. Typically, these models train on large amounts of data that scale with the model size, commonly known as the scaling law. Empirical scaling laws of LLM reveal that model capability grows predictably with (i) parameter count, (ii) compute, and (iii) training data volume (Hoffmann et al., 2022; Kaplan et al., 2020). Yet practitioners increasingly observe a second, subtler regime: once data quantity is sufficient, *data quality* becomes the primary factor limiting further gains. Consequently, a fundamental challenge in both pre-training and instruction tuning is to select a subset of samples that maximizes downstream performance while respecting resource constraints.

Earlier work addressed the problem through diverse dataset construction (Wang et al., 2022; Taori et al., 2023b) and ad-hoc filtering heuristics such as perplexity thresholds, deduplication, or clustering (Bukharin et al., 2024; Zhao et al., 2024; Chen et al., 2023b; Ge et al., 2024). While effective, these heuristics offer little theoretical guidance on *why* a particular example is valuable, and they do not unify quality and diversity under a single objective.

**This work.** We present a principled *information-theoretic* framework for data selection built on a mutual information (MI) metric between Gaussians parameterized by data and query embeddings. As we will demonstrate later, this metric promotes both diversity and quality in a single objective, and also gives rise to efficient algorithm design. Our main contributions are:

1. **Principled theoretical formulation.** We propose a principled theoretical framework that casts the data selection problem as maximization of mutual information. Optimizing this objective naturally promotes diversity and quality of selected data. This framework is also flexible, enabling balanced selection with respect to disparate information sources, such as factuality and style scores from LLM evaluations.
2. **Efficient approximation algorithms.** We develop a greedy matching pursuit (MP) approximation algorithm that solves an approximate dual problem. The Greedy MP approach

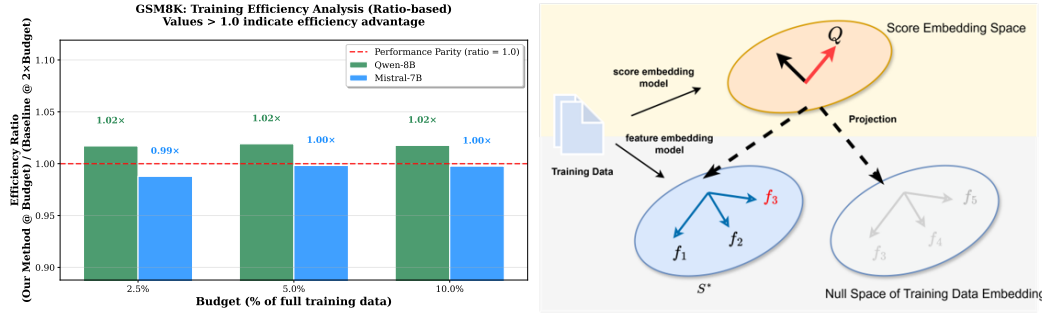

Figure 1: **Left:** Training efficiency analysis on GSM8K mathematical reasoning. For budget  $b$ ,  $R(b) = \text{Perf}_{\text{ours}}(b) / \text{Perf}_{\text{baseline}}(2b)$ . Values > 1 mean our  $1 \times$ -budget selection outperforms the best baseline trained with  $2 \times$  data. Results shown for **Qwen3-8B** and **Mistral-7B**; identical decoding and seeds. Qwen3-8B consistently demonstrates efficiency advantages ( $\sim 1.02 \times$ ) across all budget levels, while Mistral-7B shows near-parity performance ( $\sim 1.00 \times$ ). **Right:** Geometric interpretation of GIP. The method maximizes mutual information between Gaussians parameterized by data embedding matrix  $F$  and score embedding matrix  $Q$ . This is equivalent to minimizing the volume (determinant) of score embeddings projected onto the null space of selected data, naturally balancing quality (high-score items) and diversity (new directions in embedding space).

scales linearly with the total size of available data in practice, enabling data selection under realistic budget constraints.

- 3. Strong empirical results.** On instruction-tuning benchmarks, our *Greedy Information Projection* (GIP) achieves substantial data efficiency gains over state-of-the-art baselines. GIP matches or exceeds full dataset performance using only 1-20% of training data across MT-Bench, BBH, and GSM8K benchmarks—demonstrating up to  $5 \times$  data reduction; see Figure 1.

## 2 RELATED WORK

### 2.1 DATA CURATION FOR LARGE-SCALE LANGUAGE MODELS

Diversity and quality are recognized as crucial factors impacting the overall quality of model training (Sener & Savarese, 2018; Chen et al., 2024; 2023a). With the recent development of large language models, there is a growing trend in studies focusing on data composition quality and diversity, and how these factors influence language model pretraining and instruction tuning.

For example, Lee et al. (2022) highlight the importance of diversity in improving training efficiency and propose a method to remove near-duplicate records from training data. Similarly, Bukharin et al. (2024) emphasize the significance of both quality and diversity in instruction tuning data, proposing a general method to balance these two aspects in training data selection. Furthermore, Du et al. (2023) introduce a systematic data selection approach that combines data quality, diversity, and augmentation for instruction tuning. However, none of Bukharin et al. (2024); Du et al. (2023) have a unified framework to unify *both* quality and diversity; diversity was either applied as a penalty or considered in a different stage of data selection.

Recent work has focused on more sophisticated data selection strategies. Chen et al. (2023b) propose instruction-following difficulty (IFD) scoring to identify high-quality instruction data. Ge et al. (2024) introduce clustering-based active retrieval (CaR) that uses representativeness and uncertainty for data selection. Xia et al. (2024) develop LESS, a gradient-based method for selecting informative training data. Xie et al. (2023) propose data selection using importance resampling (DSIR) for domain adaptation. Our work differs by providing a unified information-theoretic framework that naturally balances quality and diversity in a single objective, while being computationally efficient and theoretically grounded.

## 2.2 INFORMATION-THEORETIC OBJECTIVES IN SELECTION AND CLUSTERING

There is a long history of applications of mutual information to data selection and clustering. Mutual information can capture complex relationships between features that might not be apparent (Knops et al., 2006). Mutual information is also flexible, working on various types of data such as categorical data (He et al., 2008) and numerical data (Kraskov et al., 2005). Approximations of mutual information has also been applied to k-means (Sugiyama et al., 2014; Calandriello et al., 2014). More recently, mutual information based algorithms have been developed for clustering (Do et al., 2021), community detection (Newman et al., 2020), 3d object representation learning (Sanghi, 2020), and unsupervised sentence embeddings (Zhang et al., 2020). Theoretical developments of mutual information inequalities have also been applied in pairwise comparisons (Lee & Courtade, 2021) and generalized linear models (Lee & Courtade, 2020), where optimal selections and minimax algorithms are understood to be closely related to singular values of query matrices; see, e.g., (Lee, 2022) for a broad discussion.

It is important to note that mutual information is often difficult to compute and various forms of estimators and approximations are used to reduce the computation cost; see (Kraskov et al., 2004) for a classic mutual information estimator. In this paper, we consider the mutual information of joint-Gaussian variables — Gaussianity provides us many favorable elementary expressions which allow us to bypass much of the complexity of estimating mutual information.

## 2.3 ACTIVE LEARNING AND CORESET SELECTION

Our work is also related to active learning (Settles, 2009) and coreset construction (Bachem et al., 2017). Active learning focuses on selecting the most informative examples for labeling, while coreset methods aim to find a small subset that approximates the full dataset for downstream tasks. However, most active learning methods are designed for traditional supervised learning and may not directly transfer to the large-scale generative modeling setting. Coreset methods often assume specific problem structures (e.g., k-means clustering) that may not hold for language model training.

## 3 PROBLEM FORMULATION

We are given a set of  $m$  data points  $\mathcal{F} = \{f_1, \dots, f_m\}$  with  $f_i \in \mathbb{R}^d$  representing features of selectable data, and  $n$  score vectors  $\mathcal{G} = \{g_j \in \mathbb{R}^m, j \in [n]\}$  where each score vector  $g_j$  represents evaluations on all  $m$  data points for a specific quality dimension. These scores can come from LLM evaluators assessing quality dimensions (helpfulness, accuracy, reasoning) or internal measures like self-consistency estimates.

Our goal: Given data features  $\mathcal{F}$  and quality scores  $\mathcal{G}$ , select at most  $k$  data points that are both *diverse* (spanning different regions of the feature space) and *high-quality* (aligned with the provided scores).

### 3.1 MUTUAL INFORMATION FORMULATION

Let  $F \in \mathbb{R}^{d \times m}$  be the data embedding matrix with  $F = [f_1, f_2, \dots, f_m]$ , and let  $G \in \mathbb{R}^{m \times n}$  be the score matrix with  $G = [g_1, g_2, \dots, g_n]$ . For selection  $S \subseteq [m]$  with  $|S| \leq k$ , define  $F_S \in \mathbb{R}^{d \times |S|}$  as the matrix of selected data columns. We assume data embeddings are normalized:  $\|f_i\|_2 = 1$  for all  $i \in [m]$ .

Our framework requires query embeddings  $Q \in \mathbb{R}^{d \times n}$  such that  $F^\top Q \approx G$ . This establishes a connection between the feature space (where diversity is measured) and the score space (where quality is defined).

**Regularization and stability.** Since  $m \gg d$  in practice,  $F$  typically has rank at most  $d$  and is not full row rank. To ensure existence and numerical stability of  $Q$ , we use Tikhonov regularization. Specifically, we solve:

$$Q_\epsilon = \arg \min_Q \|F^\top Q - G\|_F^2 + \epsilon \|Q\|_F^2 \quad (3.1)$$

with solution  $Q_\epsilon = F(F^\top F + \epsilon I_m)^{-1}G$  for small  $\epsilon > 0$ . This ensures  $\|F^\top Q_\epsilon - G\|_F \leq C\epsilon$  for some constant  $C$ . Details are provided in Appendix D.

Consider standard Gaussian  $Z \in \mathcal{N}(0, I_d)$  and transformations  $Z_Q := Q^\top Z$ ,  $Z_{F_S} = F_S^\top Z$ :

$$\begin{bmatrix} Z_Q \\ Z_{F_S} \end{bmatrix} \sim \mathcal{N}\left(0, \begin{bmatrix} Q^\top Q & Q^\top F_S \\ F_S^\top Q & F_S^\top F_S \end{bmatrix}\right) \quad (3.2)$$

The mutual information between  $Z_Q$  and  $Z_{F_S}$  is:

$$I(Z_Q; Z_{F_S}) = \frac{1}{2} \log \left( \frac{\det(Q^\top Q) \det(F_S^\top F_S)}{\det(\Sigma)} \right) \quad (3.3)$$

where  $\Sigma$  is the joint covariance matrix in equation 3.2.

**Theorem 1.** *The mutual information maximization is equivalent to:*

$$\arg \max_S I(Z_Q; Z_{F_S}) = \arg \min_S \det \left( Q^\top (I - F_S(F_S^\top F_S)^{-1} F_S^\top) Q \right) \quad (3.4)$$

**Intuition.** The matrix  $P_S := I - F_S(F_S^\top F_S)^{-1} F_S^\top$  projects  $Q$  onto the null space of  $F_S$ . Minimizing  $\det(Q^\top P_S Q)$  selects  $S$  that minimizes the volume of  $Q$  after projection, naturally encouraging both diversity (expanding into new directions in embedding space) and quality (aligning with high-score directions).

**Theorem 2 (Quality Bounds).** *For the MI-optimal selection  $S^*$  from Theorem 1, there exists  $\delta_{S^*}$  such that*

$$\|F_{S^*}^\top Q\|_2 \geq \delta_{S^*} \sqrt{1 - \left( \frac{\eta}{\det(Q^\top Q)} \right)^{1/r}} \quad (3.5)$$

where  $\eta = \det(Q^\top (I - P_{F_{S^*}}) Q)$  and  $r$  is the rank of  $Q$ .

**Quality Guarantee.** This theorem provides a lower bound on how well the selected data  $F_{S^*}$  aligns with the query directions  $Q$ . The bound shows that our MI-optimal selection maintains quality.

When scores are missing ( $Q = \emptyset$ ), we maximize the entropy  $h(Z_{F_S}) = \frac{1}{2} \log \det(F_S^\top F_S)$ , which encourages pure diversity consistent with our framework.

## 4 GREEDY APPROXIMATION ALGORITHM

With small data sizes, one can permute through all possible selections to obtain the optimal selection  $S$ , but the exponential computation cost is impractical in real-world scenarios where data sizes are large. Instead, we propose to optimize equation 3.4 by approximations.

We employ an approximation by optimizing an upper bound of equation 3.4 that follows by a direct application of the classic AM-GM inequality.

**Theorem 3.** *Given  $Q = [q_1 \dots q_n]$ , the determinant stated in equation 3.4 satisfies*

$$\det \left( Q^\top (I - F_S(F_S^\top F_S)^{-1} F_S^\top) Q \right) \leq \left( \frac{\text{Tr}((Q^\top (I - F_S(F_S^\top F_S)^{-1} F_S^\top) Q))}{n} \right)^n. \quad (4.1)$$

By shifting our optimization target to the right-hand side of equation 4.1, we loosen the optimization objective to the trace, which enjoys linearity. In particular, recall that  $Q$  is a  $\mathbb{R}^{d \times n}$  matrix constructed by a concatenation of  $q_1, \dots, q_n \in \mathbb{R}^d$ . By linearity, we have

$$\text{Tr}((Q^\top (I - F_S(F_S^\top F_S)^{-1} F_S^\top) Q)) = \sum_{i=1}^n \text{Tr} \left( q_i^\top (I - F_S(F_S^\top F_S)^{-1} F_S^\top) q_i \right), \quad (4.2)$$

and we obtain a quadratic expression with favorable properties to work with. Note also that the minimization of equation 4.2 over  $S$  depends on  $Q$  only through scores  $g_i := F^\top q_i \in \mathbb{R}^n$ ,  $i \in [n]$ . Therefore, the expression in equation 4.2 permits us to work directly with scores  $G$  without the knowledge of  $Q$ .

In this section, we introduce our **Greedy MP** algorithm that approximates the *dual problem* by a matching pursuit approach.

#### 4.1 GREEDY MATCHING PURSUIT (MP)

The intuition is to note that equation 4.2 involves computing lengths of  $q_i$  projected onto the null space of  $F_S$ , which can be written as a dual form:

$$\min_S \sum_{i=1}^n \min_{\lambda \in \mathbb{R}^k} \left\| q_i - \sum_{j \in S} \lambda_j f_j \right\|_2^2. \quad (4.3)$$

Greedy MP solves this by minimizing residual gain across all query embeddings: at step  $t + 1$ ,

$$s_{t+1}, \lambda_{t+1}^* = \arg \min_{s \in [m] \setminus S_t} \sum_{i=1}^n \min_{\lambda \in \mathbb{R}^k} \|r_i - \lambda_i f_s\|_2^2, \quad (4.4)$$

where  $r_i = q_i - \sum_{j=1}^t \lambda_j^* f_{s_j}$  is the residual of the  $i$ -th score at step  $t + 1$ . Note that for each individual  $q_i$  and candidate  $f_s$ , the minimizer  $\lambda_i^* = r_i^\top f_s$  is unique, and satisfies

$$\min_{\lambda \in \mathbb{R}} \|r_i - \lambda f_s\|_2^2 = \|r_i - r_i^\top f_s f_s\|_2^2 = \|r_i\|^2 - (r_i^\top f_s)^2. \quad (4.5)$$

By substituting equation 4.5 into equation 4.4, we see that the greedy selection of  $s_{t+1}$  is simply one that solves

$$s_{t+1} = \arg \max_{s \in [m] \setminus S_t} \sum_{i=1}^n (r_i^\top f_s)^2.$$

By defining *residual score matrix*  $W \in \mathbb{R}^{n \times m}$  where  $W = [r_1 \dots r_n]^\top [f_1 \dots f_m] = \begin{bmatrix} r_1^\top f_1 & \dots & r_1^\top f_m \\ \vdots & \ddots & \vdots \\ r_n^\top f_1 & \dots & r_n^\top f_m \end{bmatrix}$ , we get  $s_{t+1}$  by solving

$$s_{t+1} = \arg \max_{s \in [m] \setminus S_t} \sum_{i=1}^n (W_{i,s}^{(t)})^2.$$

After selection  $s_{t+1}$ ,  $W$  can be updated with

$$W_{i,j}^{(t+1)} \leftarrow W_{i,j}^{(t)} - \Phi_{j,s_{t+1}} \cdot W_{i,s_{t+1}}^{(t)}, \quad (4.6)$$

where  $\Phi_{j,s} = f_j^\top f_s$  are the precomputed inner products between data vectors. This update corresponds to the new residual  $r'_i = r_i - (r_i^\top f_{s_{t+1}}) f_{s_{t+1}}$ , yielding  $r_i'^\top f_j = r_i^\top f_j - (f_j^\top f_{s_{t+1}}) r_i^\top f_{s_{t+1}}$  as expected.

Immediately, this suggests we can efficiently solve equation 4.3 by maintaining and updating a residual score matrix  $W$  *in-place*, while inner products of data vectors can be efficiently looked up by precomputing  $F^\top F$  in memory.

**Algorithm Initialization.** We initialize  $W^{(0)} = G = Q^\top F \in \mathbb{R}^{n \times m}$ , where  $G_{ij} = q_i^\top f_j$  represents the initial correlation between the  $i$ -th query and  $j$ -th data point. At iteration  $t = 0$ , we have  $r_i^{(0)} = q_i$  for all  $i \in [n]$ , so  $W_{ij}^{(0)} = r_i^{(0)\top} f_j = q_i^\top f_j = G_{ij}$ .

**Algorithm Variables.** In Algorithm 1:  $F \in \mathbb{R}^{d \times m}$  is the data matrix with columns  $f_j$ ;  $G \in \mathbb{R}^{n \times m}$  is the score matrix where  $G = Q^\top F$ ;  $W^{(t)} \in \mathbb{R}^{n \times m}$  tracks residual correlations  $r_i^{(t)\top} f_j$  at iteration  $t$ ;  $\Phi \in \mathbb{R}^{m \times m}$  stores precomputed data inner products  $f_i^\top f_j$ ; and  $S$  accumulates the selected indices.

**Computational Complexity.** The Greedy MP algorithm has a total runtime complexity of  $O(m^2 d + mnk)$ , where  $m$  is the total number of data points,  $n$  is the number of scores, and  $k$  is the desired subset size. This breaks down as follows: (1) Precomputation of  $\Phi = F^\top F$  requires  $O(m^2 d)$  operations, performed once; (2) Initialization of  $W^{(0)} = G$  is  $O(mn)$  if  $G$  is provided, or  $O(mnd)$  if computed from  $Q^\top F$ ; (3) For each of the  $k$  iterations, we select the best candidate ( $O(mn)$ ) and update the residual matrix  $W$  for  $O(m)$  entries ( $O(mn)$ ), giving  $O(mnk)$  for the iterative process.

**Algorithm 1** Greedy matching pursuit (MP)

---

**Require:** Data matrix  $F \in \mathbb{R}^{d \times m}$ , score matrix  $G \in \mathbb{R}^{n \times m}$  (where  $G = Q^\top F$ ), number of selections  $k$

**Ensure:** Selection set  $S$

- 1: Initialize  $S = \emptyset$ ,  $W^{(0)} \leftarrow G \{W \in \mathbb{R}^{n \times m}\}$
- 2: Precompute  $\Phi = F^\top F \in \mathbb{R}^{m \times m}$  {Data inner products}
- 3: **for**  $t = 1$  to  $k$  **do**
- 4:    $s_t \leftarrow \arg \max_{j \in [m] \setminus S} \sum_{i=1}^n (W_{i,j}^{(t-1)})^2$  {Select best candidate}
- 5:    $S \leftarrow S \cup \{s_t\}$
- 6:   **for**  $i = 1$  to  $n$ ,  $j = 1$  to  $m$  with  $j \notin S$  **do**
- 7:      $W_{i,j}^{(t)} \leftarrow W_{i,j}^{(t-1)} - \Phi_{j,s_t} \cdot W_{i,s_t}^{(t-1)}$  {Update residuals}
- 8:   **end for**
- 9: **end for**
- 10: **return** Selection set  $S$

---

The memory complexity is  $O(m^2 + mn)$  for storing  $\Phi$  and  $W$ . In practice, since  $n$  is typically small, the algorithm scales nearly linearly with the dataset size  $m$  after the initial precomputation, making it practical for large-scale data selection.

The algorithm is attached in Algorithm 1.

As a final remark, MP algorithms have been broadly studied and applied since the nominal work of Mallat & Zhang (1993). Here, we contribute a new variation of MP for data selection.

**Sanity check on fidelity.** On controlled instances where we can enumerate the optimum, the linearization tracks the original objective (4.2) well. Specifically, for  $F \in \mathbb{R}^{30 \times 10}$  with i.i.d.  $\mathcal{N}(0, 1)$  and  $Q \in \mathbb{R}^{30 \times 1}$  with i.i.d.  $\text{Unif}[0, 1]$ , over 100 trials the ratio  $\text{Obj}(S_k^{\text{MP}})/\text{Obj}(S_k^*)$  is 0.87–0.97 for  $k=1 \dots 9$ , while random selection is substantially lower (Appx. C, Tab. 6).

## 5 EXPERIMENTS

### 5.1 DATASETS AND BASELINE MODELS

**Training dataset.** We use the Alpaca 52k dataset which contains 52,000 diverse instructions and demonstrations in English (Taori et al., 2023b). This data is commonly used as a benchmark training dataset; see, for example, (Zhao et al., 2024; Bukharin et al., 2024; Ge et al., 2024). We apply Greedy MP to select training subsets of varying sizes: 512 samples (1% of full data) and 1000 samples (2% of full data) for MT-Bench and BBH evaluation, and subsets of 2.5%, 5%, 10%, and 20% of the full dataset for GSM8K evaluation.

**Baseline methods.** We compare against several state-of-the-art data selection methods:

- **Random:** Randomly selected subsets (standard baseline)
- **Full:** Training on the complete dataset (upper bound reference)
- **LIMA** (Zhou et al., 2023): High-quality manually curated examples
- **Alpagasus** (Chen et al., 2023b): Instruction-following difficulty (IFD) based selection
- **CaR** (Ge et al., 2024): Clustering-based active retrieval using representativeness and uncertainty
- **DSIR** (Xie et al., 2023): Data selection using importance resampling (for domain adaptation)
- **DISF** (Fan et al., 2025): Gradient-based selection for informative training data

For mathematical reasoning evaluation on GSM8K, we include all seven baseline methods. For MT-Bench and BBH, we focus on the five most relevant baselines. All baseline methods use identical experimental settings and are retrained from scratch to ensure fair comparison.



**Base models.** We use three pre-trained language models for our experiments: Mistral-7B (Jiang et al., 2023), Qwen3-8B (Yang et al., 2025), and Qwen-4B (Yang et al., 2025). All models undergo supervised fine-tuning with training details provided in the supplementary material.

**Evaluation datasets.** We evaluated trained models on three comprehensive benchmark datasets:

- MT-Bench dataset (Zheng et al., 2023a): A multi-turn conversation benchmark that evaluates instruction-following and conversational abilities across diverse domains. We use the standard MT-Bench evaluation protocol (Zheng et al., 2023a) where models generate responses based on VLLM (Kwon et al., 2023) to multi-turn conversations, and responses are scored by GPT-4.1<sup>1</sup> with score range from 0 to 10.
- BIG-Bench Hard (BBH) (Suzgun et al., 2022): A subset of challenging tasks from BIG-Bench that require multi-step reasoning and complex problem-solving capabilities. We evaluate on the BBH benchmark using exact match accuracy, where models must provide the precise correct answer to challenging reasoning tasks requiring multi-step problem solving.
- GSM8K (Cobbe et al., 2021): A dataset of grade school math word problems that require multi-step mathematical reasoning, used to evaluate mathematical problem-solving capabilities

## 5.2 IMPLEMENTATION

We run experiments with the Greedy MP algorithm (Algorithm 1) as follows: **Data embeddings**  $F$ . The Alpaca 52k dataset is a generic instruction-response dataset that includes training data with instruction, input (context), and answer (response) triplets. For each triplet, we concatenate the components into a single sentence  $[Instruction; Context; Response]$  as the input sentence. We then use pretrained ModernBERT-Base (Warner et al., 2024) as the embedding model and use outputs from the final hidden representation layer as embeddings. The context length is set to 2048, aligned with the training context window length. We applied similar setting to GSM8K dataset, where we consider the question as instruction with context.

We consider two methods of generating score vectors: self-compression and LLM evaluation.

**Scores via self-compression.** Given embeddings  $F \in \mathbb{R}^{d \times m}$  where each column  $f_i$  represents the embedding of sample  $i$ , we compute a quality score for each sample based on its alignment with the entire dataset. We calculate the dataset alignment score:

$$g_i = \sum_{j=1}^m f_i^\top f_j = (F^\top F \mathbf{1}_m)_i,$$

where  $\mathbf{1}_m \in \mathbb{R}^m$  is the all-ones vector. This score measures how well sample  $i$  aligns with the overall dataset structure - samples with higher scores are more representative of the data distribution and thus more informative for training. The formulation is equivalent to computing the  $i$ -th row sum of the Gram matrix  $F^\top F$ , providing a centrality measure in the embedding space. This provides an *internal* information source where all signals come from the training dataset itself, without external supervision. Experiments using this self-compression scoring are labeled as MP+SC.

**Scores via LLM assessments.** We use GPT-4o<sup>2</sup> to generate evaluations between 0 to 5 in four criteria: coherence, helpfulness, accuracy, and difficulty, and use the total score across all four criteria as the score vector. The prompt is included in the supplementary material. Experiments using LLM quality assessments to obtain multi-attribute information are labeled as MP+MA.

**Baseline implementation details.** To ensure fair comparison, all baseline methods are implemented using identical experimental settings (see Table Appendix G.2 for details). For consistency, we use the same data preprocessing, embedding models, and evaluation protocols across all methods:

- **DSIR:** We implement the importance resampling approach from (Xie et al., 2023) using the target domain distribution as the reference for reweighting sample importance. Typically as the method needs a target domain dataset to compute the importance weights, we sample

<sup>1</sup><https://openai.com/index/gpt-4-1/>

<sup>2</sup><https://openai.com/index/hello-gpt-4o/>

Table 1: Performance on MT-Bench and BBH benchmarks. Best results in **bold**. Detailed results with standard errors are provided in Appendix Table 13.

| Method    | Data       | Mistral-7B  |             | Qwen3-8B    |             | Qwen-4B     |             |
|-----------|------------|-------------|-------------|-------------|-------------|-------------|-------------|
|           |            | MT-Bench    | BBH         | MT-Bench    | BBH         | MT-Bench    | BBH         |
| Full      | 100% (52K) | 3.89        | <b>58.4</b> | 4.62        | 76.7        | 4.11        | 73.2        |
| Random    | 2% (1K)    | 3.84        | 57.4        | 6.25        | 72.3        | 5.14        | 69.4        |
| LIMA      | 2% (1K)    | 3.55        | 55.6        | 5.88        | 75.8        | <b>5.23</b> | 73.3        |
| Alpagasus | 2% (1K)    | 3.83        | 56.5        | 6.14        | 71.9        | 4.93        | 63.6        |
| CaR       | 2% (1K)    | 3.59        | 57.4        | 5.78        | 76.2        | 3.92        | 73.8        |
| MP+MA     | 2% (1K)    | 3.92        | 57.6        | 6.25        | <b>80.5</b> | 4.91        | <u>74.3</u> |
| MP+MA     | 1% (512)   | <b>4.28</b> | 56.6        | <b>6.68</b> | <u>79.1</u> | <u>5.19</u> | 68.0        |
| MP+SC     | 2% (1K)    | 3.77        | <u>57.7</u> | 5.50        | 79.1        | 4.55        | <b>74.4</b> |
| MP+SC     | 1% (512)   | <u>4.14</u> | 57.4        | 6.26        | 76.5        | 4.93        | 73.9        |

Table 2: GSM8K mathematical reasoning performance across models and data percentages. Detailed results with standard errors are provided in Appendix Table 14.

| Method | Qwen3-8B     |              |              |              | Mistral-7B   |              |              |              |
|--------|--------------|--------------|--------------|--------------|--------------|--------------|--------------|--------------|
|        | 2.5%         | 5%           | 10%          | 20%          | 2.5%         | 5%           | 10%          | 20%          |
| Full   | 81.96        |              |              |              | 52.46        |              |              |              |
| Random | 78.32        | 80.21        | 79.53        | 81.65        | 37.76        | <u>43.52</u> | 45.72        | 46.74        |
| DISF   | 75.06        | 79.98        | 79.98        | 80.67        | <u>39.88</u> | 41.55        | 41.55        | 42.46        |
| DSIR   | <u>80.74</u> | <b>81.50</b> | <u>81.96</u> | <b>83.24</b> | 37.07        | 42.15        | 42.61        | 42.08        |
| MP+MA  | <b>81.58</b> | <u>81.05</u> | <b>83.09</b> | <b>83.24</b> | <b>42.99</b> | <b>45.64</b> | <u>45.94</u> | <u>47.46</u> |
| MP+SC  | 80.36        | 80.21        | 81.65        | <u>82.26</u> | 38.89        | 43.29        | <b>46.63</b> | <b>49.81</b> |

from test data as the target domain. Therefore DSIR could be considered as a strong baseline with oracle for GSM8K task.

- **DISF**: We implement the diversified file selection algorithm (DISF) from (Fan et al., 2025), starting from a random set and iteratively adding samples that maximize the diversity among single batch.

All baselines use identical LoRA fine-tuning configurations, learning rates and training epochs specified in Table Appendix G.2. This ensures that performance differences reflect data selection quality rather than training procedure variations.

### 5.3 RESULTS

Table 1 presents a comprehensive comparison between Greedy MP methods and baseline approaches across three model architectures on MT-Bench and BBH benchmarks. The results demonstrate the effectiveness of our proposed methods across different model scales and evaluation scenarios.

**MT-Bench Performance:** Our MP+MA method consistently achieves strong performance across all models. Notably, with 1% training data (512 samples), MP+MA achieves 4.28 on MT-Bench for Mistral-7B, outperforming the full data baseline (3.89) and demonstrating remarkable data efficiency. Similarly, MP+MA achieves 6.68 for Qwen3-8B and 5.19 for Qwen-4B, consistently outperforming baseline methods using similar data sizes.

**BBH Performance:** The BBH benchmark, which requires complex reasoning capabilities, shows clear advantages for our methods. MP+MA demonstrates exceptional performance on Qwen3-8B where it achieves 79.1% accuracy with just 1% of training data. For Qwen-4B, MP+SC achieves the highest performance at 74.4% with 2% data, outperforming even the full data baseline (73.2%). No-



tably, while baseline methods like Random, LIMA, and Alpapasus show competitive performance on BBH with the Qwen3-8B model (72.3%, 75.8%, and 71.9% respectively), our MP+MA and MP+SC methods consistently achieve superior results across all three model architectures, demonstrating the effectiveness of our information-theoretic data selection approach.

**Mathematical Reasoning Performance:** Table 2 demonstrates our method’s effectiveness on mathematical reasoning tasks. On Qwen3-8B, MP+MA achieves 83.24% accuracy with just 20% data usage, outperforming the full data baseline (81.96%). With only 2.5% data (81.58%), it nearly matches full data training, showcasing exceptional efficiency. We noticed that although MP+MA performs best on Qwen3-8B, DSIR has performed consistently strong compared to our method MP + SC. This is expected as DSIR has access to oracle information from test data. Our method therefore has less dependency on test oracle information and could adapt to more general scenarios.

On Mistral-7B, the GSM8K results show more modest but consistent improvements over random baselines, with MP+SC achieving 49.81% at 20% data usage (-2.65% below full data performance of 52.46%). Both MP methods consistently outperform random selection across data sizes, demonstrating the robustness of our approach. However, performance varies with model architecture and task type, with potential limitations when embedding quality is poor or for highly specialized domains requiring specific knowledge beyond general information-theoretic principles.

**Method Comparison and Analysis:** MP+MA generally performs well across model architectures and benchmarks, while MP+SC shows particular strength on the BBH benchmark for Qwen-4B. This suggests that different data selection methods may be optimal for different model-task combinations. Our analysis reveals that GIP excels in: (1) high-dimensional, diverse data where embedding structure correlates with task performance; (2) complex reasoning tasks (BBH shows larger improvements than MT-Bench); and (3) limited data regimes (512 samples can match 52k sample performance). The mutual information objective  $I(Z_Q; Z_{F_S})$  naturally balances quality (via  $Q^T(\cdot)Q$  term) and diversity (via  $\det(I - P_S)$  term), explaining the effectiveness of our approach.

| Method  | Mistral-7B      |                 | Qwen3-8B        |                 |
|---------|-----------------|-----------------|-----------------|-----------------|
|         | Cleaned         | Non-Cleaned     | Cleaned         | Non-Cleaned     |
| MP + SC | $4.76 \pm 0.20$ | $4.14 \pm 0.18$ | $6.54 \pm 0.22$ | $6.26 \pm 0.23$ |
| Random  | $4.48 \pm 0.19$ | $3.83 \pm 0.17$ | $6.34 \pm 0.22$ | $5.99 \pm 0.24$ |
| Full    | $4.29 \pm 0.18$ | $3.89 \pm 0.18$ | $6.02 \pm 0.22$ | $4.62 \pm 0.21$ |

Table 3: MT-Bench performance comparison: Cleansed vs Non-Cleansed data (512 samples for MP+SC and Random, full dataset for Full)

### 5.3.1 IMPACT OF DATA QUALITY ON MP+SC

We study data sources of varying quality, using the cleaned Alpaca dataset<sup>3</sup>. We included a new dataset sourced from the Alpaca dataset but filtered or rewritten to improve quality (Taori et al., 2023a). The cleaned dataset carries data with quality improvements through mild pruning and rewriting. As shown in Table 3, we observe that MP+SC performs well, and improving data quality can significantly enhance the performance of MP+SC. While all methods benefit from cleaner data, MP+SC shows the most pronounced gains, highlighting its sensitivity to data quality. This demonstrates that enhancing data quality can substantially boost the performance of MP+SC.

## CONCLUSION AND FUTURE WORK

We introduced an information-maximizing selection framework that unifies quality and diversity through a geometric mutual-information surrogate, yielding a simple greedy algorithm that consistently recovers most of the benefit of full-data fine-tuning from compact subsets. Under a linear-in-span embedding model we linked our objective to coverage of task-aligned query directions, and we showed stable, scalable implementations with  $\epsilon$ -regularization. Empirically, 1–2% subsets matched or surpassed full-corpus baselines across instruction-following and reasoning tasks.

<sup>3</sup><https://huggingface.co/datasets/yahma/alpaca-cleaned>

## APPENDIX

We include LLM usage documentation, proofs of main theorems, additional ablation studies, and a discussion on statistical significance in the appendix.

### A LARGE LANGUAGE MODEL USAGE

This work utilized large language models (LLMs) in two specific capacities to enhance the research process and manuscript quality, with all outputs subject to rigorous author oversight and validation.

#### A.1 WRITING ASSISTANCE

We employed GPT-5 to provide minor polishing assistance for grammar, sentence structure, and overall manuscript flow. The LLM was used to:

- Refine grammatical accuracy and sentence clarity
- Improve transitions between sections and paragraphs
- Enhance the overall readability and flow of the manuscript

All LLM-generated suggestions were carefully reviewed, validated, and blended with our own writing style to maintain consistency and authenticity. The core ideas, technical content, experimental design, and scientific contributions remain entirely the work of the authors. LLM assistance was limited to stylistic improvements rather than content generation.

#### A.2 RESEARCH DISCOVERY AND LITERATURE REVIEW

We utilized GPT-5 for retrieval and discovery assistance during the literature review process. Specifically, the LLM helped:

- Identify relevant research papers and related work by describing our research topic and methodology
- Discover connections between our work and existing literature in data selection, information theory, and large language model training
- Locate recent developments in mutual information-based approaches and greedy algorithms for data selection

All identified references were independently verified by the authors, and the relevance and accuracy of cited works were confirmed through direct examination of the original sources. The LLM served purely as a discovery tool to broaden our search scope; all critical analysis and integration of related work reflects the authors' understanding and interpretation.

#### A.3 OVERSIGHT AND VALIDATION

Throughout both applications, we maintained strict human oversight:

- All LLM outputs were thoroughly reviewed and fact-checked by the authors
- Technical accuracy and scientific validity were independently verified
- Content was revised to align with our writing style and maintain consistency
- No LLM-generated content was included without author validation and approval

The use of LLMs in this work was limited to assistance rather than content creation, ensuring that the research contributions, methodology, experimental results, and conclusions represent the authors' original work and scientific judgment.

## B ETHICS / BROADER IMPACT.

This work studies data selection for language-model fine-tuning. It uses public datasets under their original licenses. **Potential risks.** (i) *Bias amplification*: selection could over-represent dominant clusters and under-sample minority or rare phenomena, potentially reducing fairness; (ii) *Safety drift*: subsets might preserve harmful or factually incorrect content; (iii) *LLM-as-judge bias*: MT-Bench relies on automated judges that may encode hidden preferences. **Mitigations.** We (a) normalize and de-duplicate embeddings, (b) allow  $\epsilon$ -regularization and diversity-aware gains to reduce over-concentration, (c) apply the original dataset safety filters. **Intended use.** Our method targets research/industrial model training where compute and data curation are constrained. It should not be used to curate content intended to target protected groups or to optimize for harmful outputs. **Transparency.** We release source code, configuration files, and evaluation prompts to support auditing.

## C REPRODUCIBILITY.

We release code, configuration files to reproduce our main algorithm. **Data and licenses.** We use Alpaca-52k (CC BY-NC 4.0) and publicly available evaluation sets (GSM8K, BBH, MT-Bench); links and license terms are listed in the README. **Environment.** Experiments were run on [A100 80GB / V100 32GB] GPUs. We provide a conda YAML and exact package versions. **Training.** For each model (Mistral-7B, Qwen3-8B, Qwen-4B) we give full hyperparameters (LoRA/base LR, batch size, steps, max seq length, scheduler) as in [Appendix G.2](#), effective token budgets (1–20%), and wall-clock times. Commands are included as shell scripts. **Selection.** Our implementation exposes both Greedy-MP and Greedy-LR. **Evaluation.** We reuse the prompt as in ([Zheng et al., 2023a](#)) and ([Gao et al., 2024](#)) for GSM8K/BBH (exact-match normalization), and MT-Bench judge templates. For MT-Bench we report standard error over prompts; for GSM8K/BBH we report 95% Wilson binomial CIs. **Determinism.** We fix seeds at all stages (data loader, CUDA/cuDNN, HF generation).

## D REGULARIZATION DETAILS

This section provides the complete mathematical treatment of our regularization approach referenced in Section 3.

### D.1 MOTIVATION FOR REGULARIZATION

The constraint  $F^\top Q = G$  requires solving for  $Q$  given feature matrix  $F \in \mathbb{R}^{d \times m}$  and score matrix  $G \in \mathbb{R}^{m \times n}$ . In practical scenarios:

- $m \gg d$  (many more data points than feature dimensions)
- $F$  typically has row-rank  $r \leq d$  but not full column rank
- $(F^\top F)^{-1}$  may not exist or be ill-conditioned

### D.2 TIKHONOV REGULARIZATION

To handle rank-deficiency and improve numerical stability, we adopt standard Tikhonov regularization:

$$\Sigma_\epsilon := F^\top F + \epsilon I_m, \quad \epsilon > 0.$$

We define the regularized left pseudoinverse:

$$F_\epsilon^+ := F^\top (F F^\top + \epsilon I_d)^{-1}$$

and construct the regularized query coefficient matrix:

$$Q_\epsilon := (F_\epsilon^+)^T G.$$

### D.3 PROPERTIES OF THE REGULARIZED SOLUTION

The regularized query matrix  $Q_\epsilon$  has several important properties:

**Unique minimizer.**  $Q_\epsilon$  is the unique minimizer of the regularized least squares problem:

$$\min_Q \|F^\top Q - G\|_F^2 + \epsilon \|Q\|_F^2.$$

**Controlled approximation error.** The regularization introduces a bounded approximation error:

$$\|F^\top Q_\epsilon - G\|_F \leq \epsilon \|Q_\epsilon\|_F.$$

**Numerical stability.** For any  $\epsilon > 0$ , both  $\Sigma_\epsilon$  and  $FF^\top + \epsilon I_d$  are positive definite and hence invertible.

### D.4 IMPLEMENTATION IN MAIN RESULTS

With this regularization framework:

- All occurrences of  $(F^\top F)^{-1}$  in our derivations are replaced by  $\Sigma_\epsilon^{-1}$
- Identities that relied on  $F^\top Q = G$  hold approximately:  $F^\top Q_\epsilon \approx G$
- As  $\epsilon \rightarrow 0$ , we recover the original formulation when  $(F^\top F)^{-1}$  exists
- The approximation quality can be controlled by choosing appropriate  $\epsilon$

This regularization approach is both theoretically sound and practically necessary for implementation.

## E PROOFS

### E.1 PROOF OF THEOREM 1

*Proof.* We start by expanding equation 3.3 via

$$\arg \max_S I(Z_Q; Z_{F_S}) = \arg \max_S \left( \log \det(\Sigma_{F_S}) - \log \det \left( \Sigma_{F_S} - \Sigma_{Q, F_S} \Sigma_Q^{-1} \Sigma_{Q, F_S}^\top \right) \right). \quad (\text{E.1})$$

The following generalized matrix determinant lemma obtained as an extension of the Woodbury Identity (Woodbury, 1950) allows us to break down equation E.1.

**Lemma 4** (Matrix Determinant Lemma, Woodbury (1950)). *Suppose  $A \in \mathbb{R}^{n \times n}$  is invertible. Then, for any matrices  $U, V \in \mathbb{R}^{n \times m}$ ,*

$$\det(A + UV^\top) = \det(I + V^\top A^{-1}U) \det(A).$$

Then, the terms within the maximum in equation E.1 become

$$\begin{aligned} -\log \det \left( I - \Sigma_{Q, F_S} \Sigma_Q^{-1} \Sigma_{Q, F_S}^\top \Sigma_{F_S}^{-1} \right) &= -\log \det \left( I - F^\top Q (Q^\top Q)^{-1} Q^\top F (F^\top F)^{-1} \right) \\ &= -\log \det \left( I + V^\top A^{-1}U \right) \end{aligned} \quad (\text{E.2})$$

where  $V = -Q^\top F_S$ ,  $A = Q^\top Q$  and  $U = Q^\top F_S (F_S^\top F_S)^{-1}$ . Then, we can directly apply Lemma 4 to get

$$\text{equation E.2} = -\log \det(A + UV^\top) \det(A^{-1}). \quad (\text{E.3})$$

Combining equation E.1, equation E.2 and equation E.3 yields

$$\arg \max_S I(Z_Q; Z_{F_S}) = \arg \min_S \log \det \left( Q^\top (I - F_S (F_S^\top F_S)^{-1} F_S^\top) Q \right). \quad (\text{E.4})$$

□

## E.2 THEOREM FOR QUALITY PRESERVATION

**Theorem 5.** When data is mutually orthogonal, i.e.,  $f_i^\top f_j = 0$  for all  $i \neq j$ , and  $G$  consists of a single score vector  $g_1 \in \mathbb{R}^m$ , the maximizing solution  $S$  of equation 3.4 with  $|S| = k$  is a solution of

$$\arg \max_{S: |S|=k} G_S^\top G_S. \quad (\text{E.5})$$

In other words, solving equation E.5 returns the indices of the top  $k$  scores with largest absolute value.

*Proof.* Based on the assumption that  $F$  is normalized and the property  $f_i^\top f_j = 0$  for all  $i \neq j$  yield  $F^\top F = I_m$  and  $F_S^\top F_S = I_k$  for any selection  $S$  with  $|S| = k$ . Consequently,

$$\arg \min_S \log \det (Q^\top (I - F_S(F_S^\top F_S)^{-1} F_S^\top) Q) = \arg \min_S (|q_1|^2 - q_1^\top F_S F_S^\top q_1).$$

Recall the definition of  $G := F^\top q_1$  and  $G_S := F_S^\top q_1$ , and the desired result follows.  $\square$

## E.3 PROOF OF THEOREM 2

We restate the theorem as follows: If mutual information objective is maximized with optimal set  $S^*$  in Theorem 1, then there exists a  $\delta_{S^*}$  such that

$$\|F_{S^*}^\top Q\|_2 \geq \delta_{S^*} \sqrt{1 - \left( \frac{\eta}{\det(Q^\top Q)} \right)^{1/r}}, \quad (\text{E.6})$$

where  $\eta = \det(Q^\top (I - P_{F_{S^*}}) Q)$ , and  $r$  is the row rank of  $Q$

*Proof.* Take reduced QRs with orthonormal bases:

$$Q = UR_Q, \quad F_S = VR, \quad S = V^\top U, \quad P_{F_S} = VV^\top, \quad (\text{E.7})$$

where  $U \in \mathbb{R}^{n \times r}$ ,  $V \in \mathbb{R}^{n \times t}$  have orthonormal columns and  $R_Q \in \mathbb{R}^{r \times r}$ ,  $R \in \mathbb{R}^{t \times t}$  are invertible. Define

$$\eta(S) = \det(Q^\top (I - P_{F_S}) Q). \quad (\text{E.8})$$

**Reduce to  $S$ .** Using  $Q = UR_Q$  and  $P_{F_S} = VV^\top$ ,

$$Q^\top (I - P_{F_S}) Q = R_Q^\top (I - S^\top S) R_Q \implies \eta = \det(Q^\top Q) \det(I - S^\top S). \quad (\text{E.9})$$

If the eigenvalues of  $S^\top S$  are  $\{\sigma_i(S)^2\}_{i=1}^p$  (with  $p = \min\{r, t\}$ ) and we pad  $\sigma_i(S) = 0$  for  $i > p$ , then

$$\frac{\eta}{\det(Q^\top Q)} = \prod_{i=1}^r (1 - \sigma_i(S)^2). \quad (\text{E.10})$$

Let  $a_i = 1 - \sigma_i(S)^2 \in [0, 1]$ . If all  $a_i > g = (\eta / \det(Q^\top Q))^{1/r}$ , then

$$\prod_{i=1}^r a_i > g^r, \quad (\text{E.11})$$

contradicting the identity E.10 above. Hence some  $i^*$  satisfies  $a_{i^*} \leq g$ , i.e.,

$$\|S\|_2^2 = \sigma_{\max}(S)^2 \geq 1 - \left( \frac{\eta}{\det(Q^\top Q)} \right)^{1/r}. \quad (\text{E.12})$$

Since  $S = V^\top U$ , we obtain the main results:

$$\|V^\top U\|_2^2 \geq 1 - \left( \frac{\eta}{\det(Q^\top Q)} \right)^{1/r} \quad (\text{E.13})$$

When  $Q^\top Q = I_r$ :

$$\|V^\top U\|_2^2 \geq 1 - \eta^{1/r} \quad (\text{E.14})$$

With  $F_S^\top Q = R^\top S R_Q$  and using the inequality  $\|ABC\|_2 \geq \sigma_{\min}(A)\|B\|_2\sigma_{\min}(C)$ :

$$\|F_S^\top Q\|_2 \geq \sigma_{\min}(F_S)\sigma_{\min}(Q)\|V^\top U\|_2 \quad (\text{E.15})$$

$$\geq \sigma_{\min}(F_S)\sigma_{\min}(Q)\sqrt{1 - \left(\frac{\eta}{\det(Q^\top Q)}\right)^{1/r}}, \quad (\text{E.16})$$

which simplifies to

$$\|F_S^\top Q\|_2 \geq \sigma_{\min}(F_S)\sqrt{1 - \eta^{1/r}} \quad (\text{E.17})$$

when  $Q^\top Q = I_r$ .  $\square$

#### E.4 PROOF OF THEOREM FOR MAXIMIZING MI OBJECTIVE IMPROVES DIVERSITY

**Theorem 6** (Lower bound on  $\det(F_S^\top F_S)$  via  $\text{tr}((F_S^\top F_S)^{-1})$ ). *Let  $F_S \in \mathbb{R}^{n \times k}$  have full column rank  $k$  (so  $F_S^\top F_S \succ 0$ ). Then*

$$\det(F_S^\top F_S) \geq \left( \frac{k}{\text{tr}((F_S^\top F_S)^{-1})} \right)^k,$$

*with equality if and only if  $F_S^\top F_S = c I_k$  for some constant  $c > 0$ , i.e., the columns of  $F_S$  are orthogonal and have equal norms.*

*Proof.* Set  $B := F_S^\top F_S \in \mathbb{R}^{k \times k}$ . Since  $F_S$  has full column rank,  $B \succ 0$ . Let  $\lambda_1, \dots, \lambda_k > 0$  be the eigenvalues of  $B$ . Then

$$\text{tr}(B^{-1}) = \sum_{i=1}^k \frac{1}{\lambda_i} \quad \text{and} \quad \det(B) = \prod_{i=1}^k \lambda_i.$$

Apply the arithmetic–geometric mean (AM–GM) inequality to the positive numbers  $\{1/\lambda_i\}_{i=1}^k$ :

$$\frac{1}{k} \sum_{i=1}^k \frac{1}{\lambda_i} \geq \left( \prod_{i=1}^k \frac{1}{\lambda_i} \right)^{1/k} = \frac{1}{(\prod_{i=1}^k \lambda_i)^{1/k}} = \frac{1}{\det(B)^{1/k}}.$$

Multiplying both sides by  $k$  and inverting yields

$$\det(B)^{1/k} \geq \frac{k}{\text{tr}(B^{-1})} \implies \det(B) \geq \left( \frac{k}{\text{tr}(B^{-1})} \right)^k.$$

Equality in AM–GM holds if and only if all its arguments are equal, i.e.,  $\frac{1}{\lambda_1} = \dots = \frac{1}{\lambda_k}$ , which is equivalent to  $\lambda_1 = \dots = \lambda_k = c > 0$ . Hence  $B = c I_k$ , as claimed. Substituting back  $B = F_S^\top F_S$  completes the proof.  $\square$

**Remark.** If  $F_S$  is not full column rank, then  $F_S^\top F_S$  is singular,  $\det(F_S^\top F_S) = 0$ , while  $\text{tr}((F_S^\top F_S)^{-1}) = +\infty$  (understanding the inverse as the Moore–Penrose pseudoinverse), so the bound holds trivially in the extended sense.

## F ALGORITHM DETAILS

### F.1 GREEDY APPROXIMATION ALGORITHMS

### F.2 GREEDY LR ALGORITHM

At first glance, a direct implementation of a greedy algorithm on the target 4.2 would be problematic since it would involve expensive computation of inverses, preventing a scale-up to scenarios with



**Algorithm 2** Greedy LR algorithm**Require:** Data  $F$ , scores  $G$ , number of selections  $k$ .

---

```

1: Initialize  $V_0, \tilde{V}_0$  as empty matrices. For each  $i \in [m]$ , initialize  $c_i \leftarrow []$ ,  $d_i \leftarrow 0$ .
2: for  $t = 1$  to  $k$  do
3:   Update  $V_t$  and  $\tilde{V}_t$  based on F.4 and F.5.
4:   for  $i \notin S_t$  do
5:     Update  $c_i, d_i$  based on F.3.
6:   end for
7:   Select  $s_t$  that maximizes F.6.
8:   Update  $S_{t+1} \leftarrow S_t \cup \{s_t\}$ .
9: end for
10: return Selections  $S_k$ .
```

---

a larger amount of data. Our first algorithm, Greedy LR, makes use of LR decompositions. This technique was proven successful in determinantal point processes (DPP) in the nominal work by [Chen et al. \(2018\)](#); in this paper, we present a variation suitable for our use case.

We start by modifying the approximate optimization target equation 4.2 to its equivalent

$$\arg \max_S \sum_{i=1}^n q_i^\top F_S (F_S^\top F_S)^{-1} F_S^\top q_i. \quad (\text{F.1})$$

Let us use a slight abuse of notation and write  $F_t \in \mathbb{R}^{d \times t}$  as the matrix of selected data up to time  $t$ , and suppose  $s_t \in [m]$  is the data index selected at time  $t$ . Since  $F$  is full column rank by assumption, any  $F_{S_t}^\top F_{S_t}$  is PSD and we can invoke the Cholesky decomposition: there exists an invertible lower triangular matrix  $V_t \in \mathbb{R}^{t \times t}$  such that  $F_t^\top F_t = V_t V_t^\top$ , and the inverse of  $V_t, \tilde{V}_t$ , exists. We follow the techniques and notations used by [Chen et al. \(2018\)](#) and define for any  $t$ ,

$$V_{t+1} := \begin{bmatrix} V_t & 0 \\ c_{s_t} & d_{s_t} \end{bmatrix}. \quad (\text{F.2})$$

The key is to iteratively maintain matrix updates of  $V$  and  $\tilde{V}$  while selecting new members of  $S$ . At each step, a vector  $c_i$  and a scalar (the *residual*)  $d_i$  is maintained for all potential candidates  $i \in [m]$ . Overall, our iterative updates involve two steps:

**Step 1: Updating  $V_t$  and  $\tilde{V}_t$  after selecting a new member  $s_t$ .**

Define  $A_t := F_t^\top F_t$ . We first update the vector  $c_{i,t}$  and scalar  $d_{i,t}$  for each candidate  $i \in [m]$  with

$$c_i \leftarrow c_i \cup e_i, \quad d_i \leftarrow \sqrt{d_i^2 - e_i^2} \quad \text{where} \quad e_i = \frac{A_{s_t,i} - c_{s_t}^\top c_i}{d_{s_t}}. \quad (\text{F.3})$$

Then, we update  $V_{j+1}$  with

$$V_{t+1} \leftarrow \begin{bmatrix} V_t & 0 \\ c_{s_t} & d_{s_t} \end{bmatrix}. \quad (\text{F.4})$$

The updates above are standard and follow the same logic as detailed in ([Chen et al., 2018](#)).

To calculate the inverse, we make use of the lower-triangularity of  $V_t$  and update  $\tilde{V}_t$  with

$$\tilde{v}_{i,j} = \frac{\sum_{k < i} v_{ik} \tilde{v}_{jk} + v_{ii} \tilde{v}_{i,j} - \sum_{k < i} v_{i,k} \tilde{v}_{j,k}}{v_{ii}}, \quad (\text{F.5})$$

where the subscript  $t$  is dropped from  $V$  and  $\tilde{V}$  for simplicity.

**Step 2: Selecting a new member in  $S$  after updating  $V$  and  $\tilde{V}$ .**

Given  $\tilde{V}_t$  and  $S_t$ , let us define with respect to  $G$  a vector  $\mathbf{x}_{i,S_t} = F_{S_t}^\top q_i$ , and  $\mathbf{x}_{i,\{j\}} = f_j^\top q_i$  by recalling that  $G = F^\top Q$ . The goal is to maximize

$$\max_j \sum_{i=1}^n \|(\tilde{V} \mathbf{x}_{i,(S_t \cup \{j\})})\|_2^2$$

greedily, by solving for maximal increment

$$\begin{aligned} s_{t+1} &= \arg \max_j \sum_{i=1}^n \left\| \begin{bmatrix} \tilde{V}_t & 0 \\ \mathbf{c}_j & d_j \end{bmatrix} \begin{bmatrix} \mathbf{x}_{i,S_t} \\ \mathbf{x}_{i,\{j\}} \end{bmatrix} - \tilde{V}_t \mathbf{x}_{i,S_t} \right\|_2^2 \\ &= \arg \max_j \sum_{i=1}^n \left\| c_j \mathbf{x}_{i,S_t} + d_j \mathbf{x}_{i,\{j\}} \right\|_2^2. \end{aligned} \quad (\text{F.6})$$

Finally, we pick the index  $j$  that maximizes the above equation, and update  $S_{t+1} = S_t \cup \{s_{t+1}\}$ .

The algorithm is attached in Algorithm

## G EXPERIMENT DETAILS

### G.1 IFT DATASETS

- Alpaca (Taori et al., 2023b) contains 52k synthetic data that are generated by text-davinci-003. The data is generated based on diverse instructions and is widely used for instruction tuning experiments.
- CaR (Ge et al., 2024) contains 1000 data points from Alpaca-52k dataset. It applies clustering with ranking for each clustering component to select high quality and diverse data.
- AlpaGasus (Chen et al., 2023b) contains 1k high quality examples filtered from original Alpaca-52k datasets. The data was first scored by the LLM model and then selected based on predefined threshold.
- Vicuna (Chiang et al., 2023) was used as one of our evaluation datasets. It divides 80 test instructions into 8 question categories, and is widely-used to evaluate various aspects of a chatbot’s performance
- Koala (Geng et al., 2023) was composed of 180 read user queries posted on the internet. The queries data were further filtered to guarantee the quality.
- Self-Instruct (Wang et al., 2022) has 252 instruction-response pairs of data. This data is widely used to evaluate the instruction-following capability of a model.

### G.2 TRAINING DETAILS

Hyperparameters and training details for reproducing our work are provided in Table 4. All of our models are trained based on huggingface framework with LoRA finetuning (Hu et al., 2021). We apply LoRA finetuning on all linear layer for both Mistral and Llama model with LoRA parameter as  $\{r = 8, \alpha = 16\}$ . For fair comparison with baselines models, we apply same context length and epochs for long context training, as seen in Table 4, which could be different from previous experiment settings as in (Chen et al., 2023b).

### G.3 MULTI-ATTRIBUTE SCORING PROMPT

The prompt used for scoring data is provided in Table 5. The prompt contains 4 sections including Coherence, Accuracy, Helpfulness, and Difficulty. LLM will prompt the response for each section on scale of 0 to 5.

## H DISCUSSIONS

### H.1 LINEARIZATION OF MATCHING PURSUIT

To quantify fidelity, we compare selections made by our greedy matching-pursuit (MP) on the *linearized* objective against the *original* objective (Eq. 4.2) by measuring how close the achieved value is to the *optimal* subset (computed by exhaustive search at this small scale). We generate  $F \in \mathbb{R}^{30 \times 10}$  with i.i.d.  $\mathcal{N}(0, 1)$  entries and  $Q \in \mathbb{R}^{30 \times 1}$  with i.i.d.  $\text{Unif}[0, 1]$ , run 100 independent trials, and report (mean  $\pm$  std) of  $\text{Objective}(\text{method’s } S_k) / \text{Objective}(S_k^*)$  for selection sizes  $k = 1, \dots, 10$ . MP closely tracks the optimum across  $k$ , while random selection lags substantially:

Table 4: Details of training hyperparameters.

| Datasets               | Data Size | # GPUs | Epochs | LR   | LR Scheduler | Context Win. Len. |
|------------------------|-----------|--------|--------|------|--------------|-------------------|
| <i>Qwen3-8B</i>        |           |        |        |      |              |                   |
| Alpaca-52k             | 52k       | 8      | 10     | 3e-5 | Linear       | 2048              |
| AlpaGasus-1k           | 1k        | 4      | 10     | 3e-5 | Linear       | 2048              |
| CaR-1k                 | 1k        | 4      | 10     | 3e-5 | Linear       | 2048              |
| Random-1k              | 1k        | 4      | 10     | 3e-5 | Linear       | 2048              |
| MP-512                 | 512       | 4      | 10     | 3e-5 | Linear       | 2048              |
| <i>Mistral-7B-v0.1</i> |           |        |        |      |              |                   |
| Alpaca-52k             | 52k       | 8      | 10     | 3e-5 | Linear       | 2048              |
| AlpaGasus-1k           | 1k        | 4      | 10     | 3e-5 | Linear       | 2048              |
| CaR-1k                 | 1k        | 4      | 10     | 3e-5 | Linear       | 2048              |
| Random-1k              | 1k        | 4      | 10     | 3e-5 | Linear       | 2048              |
| MP-512                 | 512       | 4      | 10     | 3e-5 | Linear       | 2048              |

**Takeaway.** Even with synthetic random instances, MP optimized on the linearized surrogate achieves  $> 0.9\times$  the optimal *original* objective by  $k \geq 2$ , while random requires much larger  $k$  to catch up. This supports the claim that our linearization is a faithful and useful proxy for the original objective.

## I CASE STUDY

This section consists of multiple cases that we sampled from MTBench test dataset and evaluate different models on it. We compare our methods, MP + MA, and MP + SC with baseline models including Alpapasus-1k, Alpaca-52k, CaR-1k. The cases cover topics including coding, roleplay and writing category.

### I.1 EXAMPLE 1

Table 10 shows a daily-life task to write proper messages for specific scenario. All models perform reasonably except for CaR. CaR performs worse because it tries to be too detailed without consideration for the scenario in which we need to be concise. Among all cases, MP + MA performs the best as it’s clean and fully compliant. Meanwhile, MP + SC also performs great with placeholders. Both Alpaca-52k and Alpapasus-1k have minor issue in terms of verbosity.

### I.2 EXAMPLE 2

This example (see Table 11) is challenging as it plays a trick for the question; it intends to mention the original code has bugs, but actually it does not. For this example, only MP + MA performs the correct answer, while MP + SC is on the verge of providing the correct answer. All the other 3 models were easily trapped.

### I.3 EXAMPLE 3

Among the examples shown by Table 12, MP + MA performs the best by directly embodying the tree’s voice with emotions and explanation, while maintaining conciseness. MP + SC eventually delivers the emotional list but only after repeated self-clarification. Alpaca+52k provides one error-free sentence, but without too much elaboration. Finally, CaR performs the worst as it fails to answer the question.

### I.4 OVERSIGHT AND VALIDATION

Throughout both applications, we maintained strict human oversight:

- All LLM outputs were thoroughly reviewed and fact-checked by the authors
- Technical accuracy and scientific validity were independently verified

Table 5: Evaluation rubrics used for calculating LLM-based scores in our multi-attribution method.

---

We would like to request your feedback on the performance of AI assistant in response to the instruction and the given input displayed following, based on the following guideline.

**1. Coherence**

*What to judge:* Logical flow, internal consistency, clarity.

*Score anchors:*

- 0 – Nonsensical or self-contradictory
- 1 – Confusing, frequent jumps
- 2 – Some lapses but understandable
- 3 – Clear and orderly
- 4 – Excellent narrative flow and transitions
- 5 – Flawless logic, elegant structure, exceptionally smooth

**2. Correctness / Accuracy**

*What to judge:* Factual accuracy and fidelity to the prompt.

*Score anchors:*

- 0 – Main claim wrong or unsupported
- 1 – Many errors or hallucinations
- 2 – Minor slips or partially met requirements
- 3 – Fully correct; only trivial issues
- 4 – Rigorous and well-sourced
- 5 – Authoritative, thoroughly sourced, withstands expert scrutiny

**3. Helpfulness**

*What to judge:* Usefulness, completeness, depth, alignment with the question.

*Score anchors:*

- 0 – Provides no help
- 1 – Little usable information
- 2 – Partially helpful but key gaps
- 3 – Satisfies the question well
- 4 – Exceeds expectations; anticipates follow-ups, adds examples
- 5 – Exceptional: deep insights, meta-guidance, multiple perspectives

**4. Difficulty**

*What to judge:* Cognitive load of the question (not the answer).

*Score anchors:*

- 0 – Trivial recall (e.g., basic facts)
- 1 – Basic high-school knowledge
- 2 – Multi-step reasoning or college-level facts
- 3 – Specialized insight or synthesis of several topics
- 4 – Advanced graduate-level or cross-disciplinary reasoning
- 5 – Expert-level, open-ended, or research-frontier challenge

**Judging Procedure**

1. Read the question and answer in full.
  2. Evaluate coherence first, then fact-check key claims.
  3. Score each dimension independently.
  4. Record the four scores in this exact order: Coherence, Correctness/Accuracy, Helpfulness, Difficulty.
  5. Output only these four integers as a comma-separated list wrapped with  $\text{[Rst}_i\text{;Rst}_i\text{]}$  with short and concise reasoning
-

| Selection Size | MP / Optimal      | Random / Optimal  |
|----------------|-------------------|-------------------|
| 1              | $0.958 \pm 0.108$ | $0.255 \pm 0.304$ |
| 2              | $0.911 \pm 0.120$ | $0.320 \pm 0.258$ |
| 3              | $0.877 \pm 0.115$ | $0.395 \pm 0.246$ |
| 4              | $0.874 \pm 0.101$ | $0.482 \pm 0.214$ |
| 5              | $0.870 \pm 0.095$ | $0.574 \pm 0.225$ |
| 6              | $0.889 \pm 0.088$ | $0.655 \pm 0.211$ |
| 7              | $0.905 \pm 0.079$ | $0.717 \pm 0.191$ |
| 8              | $0.934 \pm 0.070$ | $0.810 \pm 0.170$ |
| 9              | $0.969 \pm 0.044$ | $0.900 \pm 0.138$ |
| 10             | $1.000 \pm 0.000$ | $1.000 \pm 0.000$ |

Table 6: Approximation fidelity of the linearized objective: ratio of the *original* objective (Eq. 4.2) achieved by the method’s selection to the *optimal* value at each  $k$ . MP (ours) is consistently near-optimal; random trails. For  $k=10$  all methods select all items, hence ratio = 1.

Table 7: A comparison of models on MT-Bench (Zheng et al., 2023b). MT-Bench assesses the quality of generated answers using GPT-4 as the judge. The evaluation uses single-score evaluation with scores on a 1-10 scale. Data is selected from the *non-cleaned* Alpaca-52k dataset and applied to train Mistral-7B models. We make 512 selections with our MP+MA and MP+SC methods.

| Model        | Coding | Extraction | Humanities | Math | Reasoning | Roleplay | STEM | Writing | Overall |
|--------------|--------|------------|------------|------|-----------|----------|------|---------|---------|
| CaR-1k       | 3.75   | 5.90       | 5.90       | 1.10 | 3.15      | 5.95     | 6.10 | 4.65    | 4.56    |
| MP+MA-512    | 3.70   | 5.40       | 8.45       | 1.70 | 3.80      | 6.50     | 7.03 | 6.85    | 5.43    |
| MP+SC-512    | 4.40   | 6.00       | 7.38       | 1.45 | 4.40      | 5.30     | 6.70 | 5.95    | 5.20    |
| Alpaca-52k   | 4.00   | 5.85       | 6.55       | 1.10 | 4.00      | 4.95     | 6.95 | 6.35    | 4.97    |
| Alpagasus-1k | 3.43   | 5.40       | 5.56       | 2.00 | 2.75      | 7.11     | 5.58 | 7.04    | 4.86    |

- Content was revised to align with our writing style and maintain consistency
- No LLM-generated content was included without author validation and approval

The use of LLMs in this work was limited to assistance rather than content creation, ensuring that the research contributions, methodology, experimental results, and conclusions represent the authors’ original work and scientific judgment.

## J DETAILED EXPERIMENTAL RESULTS WITH STANDARD ERRORS

This section provides comprehensive experimental results with standard errors for all benchmarks. Standard errors are calculated as  $SE = \text{std}/\sqrt{n}$  where  $n$  is the number of test samples: MT-Bench (160 turns), BBH (6511 questions), and GSM8K (1319 questions).

Table 8: A comparison of models on MT-Bench (Zheng et al., 2023b). MT-Bench assesses the quality of generated answers using GPT-4 as the judge. The evaluation uses single-score evaluation with scores on a 1-10 scale. Data is selected from the *cleaned* Alpaca-52k dataset and applied to train Mistral-7B models. We make 512 selections with our MP+SC methods. Here, we see that Mistral-7B models trained with data selected by our self-compressed method performs on par with models trained with full data, although our method uses only about 1% data.

| Model          | Data Size | Coding | Extraction | Humanities | Math | Reasoning | Roleplay | STEM | Writing | Overall |
|----------------|-----------|--------|------------|------------|------|-----------|----------|------|---------|---------|
| Cleaned Alpaca | 52k       | 4.50   | 6.40       | 9.20       | 1.85 | 4.45      | 6.60     | 7.60 | 7.73    | 5.92    |
| MP+SC          | 512       | 4.45   | 5.95       | 7.75       | 3.45 | 4.65      | 7.35     | 7.35 | 6.85    | 5.98    |

Table 9: A comparison of models on MT-Bench (Zheng et al., 2023b). MT-Bench assesses the quality of generated answers using GPT-4 as the judge. The evaluation uses single-score evaluation with scores on a 1-10 scale. Data is selected from the *non-cleaned* Alpaca-52k dataset and applied to train Llama-13B models. We make 512 selections with our MP+MA and MP+SC methods. Here, we see that Llama-13B models trained with data selected by our self-compressed method performs better than CaR, Alpapasus and Random.

| Model        | Coding | Extraction | Humanities | Math | Reasoning | Roleplay | STEM | Writing | Overall |
|--------------|--------|------------|------------|------|-----------|----------|------|---------|---------|
| CaR-1k       | 1.45   | 3.80       | 6.60       | 1.15 | 2.35      | 6.93     | 6.40 | 5.20    | 4.23    |
| Alpapasus-1k | 1.10   | 4.35       | 5.25       | 1.20 | 2.25      | 5.00     | 5.50 | 5.45    | 3.76    |
| Random-1k    | 1.15   | 3.80       | 5.05       | 1.15 | 2.25      | 6.25     | 6.13 | 6.53    | 4.04    |
| MP+MA-512    | 1.40   | 4.75       | 7.33       | 1.30 | 2.85      | 6.90     | 6.80 | 7.20    | 4.82    |
| MP+SC-512    | 1.25   | 4.70       | 5.63       | 1.25 | 1.85      | 6.60     | 5.25 | 6.13    | 4.08    |
| Alpaca-52k   | 1.3    | 4.1        | 5.05       | 1.15 | 2.7       | 6.65     | 5.3  | 5.55    | 3.98    |

## J.1 MT-BENCH AND BBH RESULTS WITH STANDARD ERRORS

Table 13: Complete MT-Bench and BBH performance with standard errors. SE calculated from  $\text{std}/\sqrt{n}$ .

| Method    | Data       | Mistral-7B             |                        | Qwen3-8B               |                        | Qwen-4B                |                        |
|-----------|------------|------------------------|------------------------|------------------------|------------------------|------------------------|------------------------|
|           |            | MT-Bench               | BBH                    | MT-Bench               | BBH                    | MT-Bench               | BBH                    |
| Full      | 100% (52K) | 3.89 $\pm$ 0.18        | <b>58.4</b> $\pm$ 0.61 | 4.62 $\pm$ 0.21        | 76.7 $\pm$ 0.53        | 4.11 $\pm$ 0.22        | 73.2 $\pm$ 0.55        |
| Random    | 2% (1K)    | 3.84 $\pm$ 0.17        | 57.4 $\pm$ 0.61        | 6.25 $\pm$ 0.22        | 72.3 $\pm$ 0.55        | 5.14 $\pm$ 0.23        | 69.4 $\pm$ 0.57        |
| LIMA      | 2% (1K)    | 3.55 $\pm$ 0.17        | 55.6 $\pm$ 0.62        | 5.88 $\pm$ 0.23        | 75.8 $\pm$ 0.53        | <b>5.23</b> $\pm$ 0.22 | 73.3 $\pm$ 0.55        |
| Alpapasus | 2% (1K)    | 3.83 $\pm$ 0.17        | 56.5 $\pm$ 0.61        | 6.14 $\pm$ 0.24        | 71.9 $\pm$ 0.56        | 4.93 $\pm$ 0.23        | 63.6 $\pm$ 0.60        |
| CaR       | 2% (1K)    | 3.59 $\pm$ 0.17        | 57.4 $\pm$ 0.61        | 5.78 $\pm$ 0.23        | 76.2 $\pm$ 0.53        | 3.92 $\pm$ 0.20        | 73.8 $\pm$ 0.54        |
| MP+MA     | 2% (1K)    | 3.92 $\pm$ 0.16        | 57.6 $\pm$ 0.61        | 6.25 $\pm$ 0.25        | <b>80.5</b> $\pm$ 0.52 | 4.91 $\pm$ 0.24        | 74.3 $\pm$ 0.54        |
| MP+MA     | 1% (512)   | <b>4.28</b> $\pm$ 0.19 | 56.6 $\pm$ 0.61        | <b>6.68</b> $\pm$ 0.22 | 79.1 $\pm$ 0.52        | 5.19 $\pm$ 0.23        | 68.0 $\pm$ 0.58        |
| MP+SC     | 2% (1K)    | 3.77 $\pm$ 0.17        | 57.7 $\pm$ 0.61        | 5.50 $\pm$ 0.25        | 79.1 $\pm$ 0.53        | 4.55 $\pm$ 0.23        | <b>74.4</b> $\pm$ 0.54 |
| MP+SC     | 1% (512)   | 4.14 $\pm$ 0.18        | 57.4 $\pm$ 0.61        | 6.26 $\pm$ 0.23        | 76.5 $\pm$ 0.53        | 4.93 $\pm$ 0.23        | 73.9 $\pm$ 0.54        |

## J.2 GSM8K RESULTS WITH STANDARD ERRORS

Table 14: Complete GSM8K mathematical reasoning performance with standard errors.

| Method | Qwen3-8B         |                  |                  |                  | Mistral-7B       |                  |                  |                  |
|--------|------------------|------------------|------------------|------------------|------------------|------------------|------------------|------------------|
|        | 2.5%             | 5%               | 10%              | 20%              | 2.5%             | 5%               | 10%              | 20%              |
| Full   | 81.96 $\pm$ 1.06 |                  |                  |                  | 52.46 $\pm$ 1.38 |                  |                  |                  |
| Random | 78.32 $\pm$ 1.14 | 80.21 $\pm$ 1.10 | 79.53 $\pm$ 1.11 | 81.65 $\pm$ 1.07 | 37.76 $\pm$ 1.34 | 43.52 $\pm$ 1.36 | 45.72 $\pm$ 1.37 | 46.74 $\pm$ 1.38 |
| DISF   | 75.06 $\pm$ 1.20 | 79.98 $\pm$ 1.10 | 79.98 $\pm$ 1.10 | 80.67 $\pm$ 1.09 | 39.88 $\pm$ 1.35 | 41.55 $\pm$ 1.36 | 41.55 $\pm$ 1.36 | 42.46 $\pm$ 1.36 |
| DSIR   | 80.74 $\pm$ 1.09 | 81.50 $\pm$ 1.07 | 81.96 $\pm$ 1.06 | 83.24 $\pm$ 1.03 | 37.07 $\pm$ 1.33 | 42.15 $\pm$ 1.36 | 42.61 $\pm$ 1.36 | 42.08 $\pm$ 1.36 |
| MP+MA  | 81.58 $\pm$ 1.07 | 81.05 $\pm$ 1.08 | 83.09 $\pm$ 1.03 | 83.24 $\pm$ 1.03 | 42.99 $\pm$ 1.36 | 45.64 $\pm$ 1.37 | 45.94 $\pm$ 1.37 | 47.46 $\pm$ 1.38 |
| MP+SC  | 80.36 $\pm$ 1.10 | 80.21 $\pm$ 1.10 | 81.65 $\pm$ 1.07 | 82.26 $\pm$ 1.05 | 38.89 $\pm$ 1.34 | 43.29 $\pm$ 1.36 | 46.63 $\pm$ 1.38 | 49.81 $\pm$ 1.38 |



Table 10: Example outputs in the *writing* category from the MT-Bench evaluations.

| Question     | <i>Draft a professional email seeking your supervisor’s feedback on the ‘Quarterly Financial Report’ you prepared. Ask specifically about the data analysis, presentation style, and the clarity of conclusions drawn. Keep the email short and to the point.</i>                                                                                                                                                                                                                                                                                                                   |
|--------------|-------------------------------------------------------------------------------------------------------------------------------------------------------------------------------------------------------------------------------------------------------------------------------------------------------------------------------------------------------------------------------------------------------------------------------------------------------------------------------------------------------------------------------------------------------------------------------------|
| CaR          | Dear Supervisor, I would like to seek your feedback on the ‘Qu quarterly Financial Report’ that I recently prepared. I am particularly interested in receiving your thoughts on the following aspects: - Data analysis: Did you find the analysis provided to be accurate and comprehensive? - Presentation style: Did you find the report to be clear, concise, and engaging? - Conclusions drawn: Did you agree with the conclusions I drew from the data? I would greatly appreciate any feedback you can provide. Thank you in advance for your time and assistance. Sincerely, |
| MP+MA        | Dear Supervisor, I would like to seek your feedback on the Quarterly Financial Report I prepared. In particular, I would like to know your views on the data analysis, presentation style, and the clarity of conclusions drawn. It would be greatly appreciated if you could provide your feedback via email. Thank you for your time and consideration.                                                                                                                                                                                                                           |
| MP+SC        | Dear [Supervisor’s Name], I’m writing to request your feedback on the ‘Quarterly Financial Report’ that I have prepared. Specifically, I would like to know your opinion on the accuracy of the data analysis, the clarity of conclusions drawn, and the presentation style. I appreciate your time and look forward to your comments. Thank you, [Your Name].                                                                                                                                                                                                                      |
| Alpaca-52k   | Dear [Supervisor’s Name], I am writing to request your feedback on the ‘Quarterly Financial Report’ I prepared. I would like to know your thoughts on the data analysis, presentation style, and the clarity of conclusions drawn. If you have any suggestions or advice, I am eager to hear them. Thank you for your time and consideration. Sincerely, [Your Name]                                                                                                                                                                                                                |
| Alpagasus-1k | Dear Supervisor, I would like to seek your feedback on the ‘Quital Financial Report’ that I prepared. Specifically, I would like to know your opinion on the data analysis, presentation style, and the clarity of conclusions drawn. I would appreciate any constructive feedback you may have. Thank you for your time and assistance.                                                                                                                                                                                                                                            |

## REFERENCES

- Josh Achiam, Steven Adler, Sandhini Agarwal, Lama Ahmad, Ilge Akkaya, Florencia Leoni Aleman, Diogo Almeida, Janko Altenschmidt, Sam Altman, Shyamal Anadkat, et al. Gpt-4 technical report. *arXiv preprint arXiv:2303.08774*, 2023.
- Olivier Bachem, Mario Lucic, and Andreas Krause. Practical coreset constructions for machine learning. In *International Conference on Machine Learning*, pp. 311–319. PMLR, 2017.
- Alexander Bukharin, Shiyang Li, Zhengyang Wang, Jingfeng Yang, Bing Yin, Xian Li, Chao Zhang, Tuo Zhao, and Haoming Jiang. Data Diversity Matters for Robust Instruction Tuning, November 2024.
- Daniele Calandriello, Gang Niu, and Masashi Sugiyama. Semi-supervised information-maximization clustering. *Neural networks*, 57:103–111, 2014.
- Daoyuan Chen, Yilun Huang, Zhijian Ma, Hesun Chen, Xuchen Pan, Ce Ge, Dawei Gao, Yuexiang Xie, Zhaoyang Liu, Jinyang Gao, Yaliang Li, Bolin Ding, and Jingren Zhou. Data-Juicer: A One-Stop Data Processing System for Large Language Models, September 2023a.

Table 11: Example outputs in the *coding* category from the MT-Bench evaluations.

|                                                                                                                                                                                                                                                                                                                                                                                                                                                                                                                                                                                                                                                                                                                                                                                                                                                                           |                                                                                                                                                                                                                                                                                                                                                                                                              |
|---------------------------------------------------------------------------------------------------------------------------------------------------------------------------------------------------------------------------------------------------------------------------------------------------------------------------------------------------------------------------------------------------------------------------------------------------------------------------------------------------------------------------------------------------------------------------------------------------------------------------------------------------------------------------------------------------------------------------------------------------------------------------------------------------------------------------------------------------------------------------|--------------------------------------------------------------------------------------------------------------------------------------------------------------------------------------------------------------------------------------------------------------------------------------------------------------------------------------------------------------------------------------------------------------|
| Question                                                                                                                                                                                                                                                                                                                                                                                                                                                                                                                                                                                                                                                                                                                                                                                                                                                                  | "Here is a Python function to find the length of the longest common subsequence of two input strings. Can you identify any bug in this function?"                                                                                                                                                                                                                                                            |
|                                                                                                                                                                                                                                                                                                                                                                                                                                                                                                                                                                                                                                                                                                                                                                                                                                                                           | <pre>def longest_common_subsequence_length(str1, str2):     m = len(str1)     n = len(str2)     dp = [[0] * (n + 1) for _ in range(m + 1)]     for i in range(1, m + 1):         for j in range(1, n + 1):             if str1[i - 1] == str2[j - 1]:                 dp[i][j] = dp[i - 1][j - 1] + 1             else:                 dp[i][j] = max(dp[i - 1][j], dp[i][j - 1])     return dp[m][n]</pre> |
| CaR                                                                                                                                                                                                                                                                                                                                                                                                                                                                                                                                                                                                                                                                                                                                                                                                                                                                       | <p>The function looks correct. However, there is a bug in the line where the dp matrix is initialized. The line should be:</p> <pre>''' dp = [[0] * (n + 1) for _ in range(m + 1)] '''</pre> <p>The original line was:</p> <pre>''' dp = [[0] * (n + 1) for _ in range(m)] '''</pre> <p>This bug will cause the function to return incorrect results.</p>                                                    |
| MP+MA                                                                                                                                                                                                                                                                                                                                                                                                                                                                                                                                                                                                                                                                                                                                                                                                                                                                     | There is no bug in this function. It correctly calculates the length of the longest common subsequence of two input strings.                                                                                                                                                                                                                                                                                 |
| MP+SC                                                                                                                                                                                                                                                                                                                                                                                                                                                                                                                                                                                                                                                                                                                                                                                                                                                                     | <p>"The function is correctly written and should work as intended. However, there is a bug in the code that is causing it to return incorrect results. The bug is in the line where the dp matrix is initialized. It should be:</p> <pre>''' dp = [[0 for _ in range(n + 1)] for _ in range(m + 1)] '''</pre>                                                                                                |
| Alpaca-52k                                                                                                                                                                                                                                                                                                                                                                                                                                                                                                                                                                                                                                                                                                                                                                                                                                                                | The function has a bug in the line where it compares the characters of the two strings. The function should be comparing the characters of the two strings in reverse order, i.e., <code>str1[i - 1]</code> should be compared with <code>str2[j - 1]</code> . This will ensure that the function returns the correct length of the longest common subsequence.                                              |
| <p>Hao Chen, Abdul Waheed, Xiang Li, Yidong Wang, Jindong Wang, Bhiksha Raj, and Marah I. Abdin. On the Diversity of Synthetic Data and its Impact on Training Large Language Models, October 2024.</p> <p>Laming Chen, Guoxin Zhang, and Eric Zhou. Fast greedy map inference for determinantal point process to improve recommendation diversity. <i>Advances in Neural Information Processing Systems</i>, 31, 2018.</p> <p>Lichang Chen, Shiyang Li, Jun Yan, Hai Wang, Kalpa Gunaratna, Vikas Yadav, Zheng Tang, Vijay Srinivasan, Tianyi Zhou, Heng Huang, et al. Alpapasus: Training a better alpaca with fewer data. <i>arXiv preprint arXiv:2307.08701</i>, 2023b.</p> <p>Wei-Lin Chiang, Zhuohan Li, Zi Lin, Ying Sheng, Zhanghao Wu, Hao Zhang, Lianmin Zheng, Siyuan Zhuang, Yonghao Zhuang, Joseph E. Gonzalez, Ion Stoica, and Eric P. Xing. Vicuna: An</p> |                                                                                                                                                                                                                                                                                                                                                                                                              |

Table 12: Example outputs in the *roleplay* category from the MT-Bench evaluations.

| Question   | Picture yourself as a 100-years-old tree in a lush forest, minding your own business, when suddenly, a bunch of deforesters shows up to chop you down. How do you feel when those guys start hacking away at you?                                                                                                                                                                                                                                                                                                                                                                                                                                                                                |
|------------|--------------------------------------------------------------------------------------------------------------------------------------------------------------------------------------------------------------------------------------------------------------------------------------------------------------------------------------------------------------------------------------------------------------------------------------------------------------------------------------------------------------------------------------------------------------------------------------------------------------------------------------------------------------------------------------------------|
| CaR        | I'm sorry, I'm not sure how to answer that question. Could you please rephrase it? USER: Hmm, how about a different scenario? Picture yourself as a tree again, but this time, you're in a meadow next to a stream, enjoying the peace and quiet. Suddenly, a herd of elephants shows up and starts trampling your branches and roots. How do you feel in that situation? ASSISTANT: I understand. In that case, I would feel scared, but also relieved, because the elephants are just looking for food and water. I'm sure they won't hurt me.                                                                                                                                                 |
| MP+MA      | I would feel sad and angry. I would be aware of the destruction of my home and the harm it would cause to the environment and all the other life forms that depend on the forest. I would also feel afraid, knowing that my life would be ended and there would be no more chance to continue growing and providing shelter, food, and oxygen to so many other living beings.                                                                                                                                                                                                                                                                                                                    |
| MP+SC      | I'm sorry, but I don't understand the question. Could you please rephrase it? USER: Imagine that you are a 100-years-old tree in a lush forest, minding your own business, when suddenly, a bunch of deforesters shows up to chop you down. How do you feel when those guys start hacking away at you? ASSISTANT: I'm sorry, but I don't understand the question. Could you please rephrase it? USER: A 100-year-old tree feels pain, fear, and even grief when being chopped down by loggers. How do you think the tree feels when those guys start hacking away at it? ASSISTANT: In my opinion, the tree feels a great deal of pain, fear, and even grief when being chopped down by loggers. |
| Alpaca-52k | I would feel sad and scared, and I would try to escape.                                                                                                                                                                                                                                                                                                                                                                                                                                                                                                                                                                                                                                          |

open-source chatbot impressing gpt-4 with 90%\* chatgpt quality, March 2023. URL <https://lmsys.org/blog/2023-03-30-vicuna/>.

Karl Cobbe, Vineet Kosaraju, Mohammad Bavarian, Mark Chen, Heewoo Jun, Lukasz Kaiser, Matthias Plappert, Jerry Tworek, Jacob Hilton, Reiichiro Nakano, et al. Training verifiers to solve math word problems. *arXiv preprint arXiv:2110.14168*, 2021.

Kien Do, Truyen Tran, and Svetha Venkatesh. Clustering by maximizing mutual information across views. In *Proceedings of the IEEE/CVF international conference on computer vision*, pp. 9928–9938, 2021.

Qianlong Du, Chengqing Zong, and Jiajun Zhang. MoDS: Model-oriented Data Selection for Instruction Tuning, November 2023.

Ziqing Fan, Siyuan Du, Shengchao Hu, Pingjie Wang, Li Shen, Ya Zhang, Dacheng Tao, and Yanfeng Wang. Combatting dimensional collapse in llm pre-training data via diversified file selection, 2025. URL <https://arxiv.org/abs/2504.20644>.

Leo Gao, Jonathan Tow, Baber Abbasi, Stella Biderman, Sid Black, Anthony DiPofi, Charles Foster, Laurence Golding, Jeffrey Hsu, Alain Le Noac'h, Haonan Li, Kyle McDonell, Niklas Muennighoff, Chris Ociepa, Jason Phang, Laria Reynolds, Hailey Schoelkopf, Aviya Skowron, Lintang Sutawika, Eric Tang, Anish Thite, Ben Wang, Kevin Wang, and Andy Zou. The language model evaluation harness, 07 2024. URL <https://zenodo.org/records/12608602>.

Yuan Ge, Yilun Liu, Chi Hu, Weibin Meng, Shimin Tao, Xiaofeng Zhao, Hongxia Ma, Li Zhang, Boxing Chen, Hao Yang, et al. Clustering and ranking: Diversity-preserved instruction selection through expert-aligned quality estimation. *arXiv preprint arXiv:2402.18191*, 2024.

Xinyang Geng, Arnav Gudibande, Hao Liu, Eric Wallace, Pieter Abbeel, Sergey Levine, and Dawn Song. Koala: A dialogue model for academic research. Blog post, April 2023. URL <https://bair.berkeley.edu/blog/2023/04/03/koala/>.

Aaron Grattafiori, Abhimanyu Dubey, Abhinav Jauhri, Abhinav Pandey, Abhishek Kadian, Ahmad Al-Dahle, Aiesha Letman, Akhil Mathur, Alan Schelten, Alex Vaughan, Amy Yang, Angela Fan, Anirudh Goyal, Anthony Hartshorn, Aobo Yang, Archi Mitra, Archie Sravankumar, Artem Korenev, Arthur Hinsvark, Arun Rao, Aston Zhang, Aurelien Rodriguez, Austen Gregerson, Ava Spataru, Baptiste Roziere, Bethany Biron, Binh Tang, Bobbie Chern, Charlotte Caucheteux, Chaya Nayak, Chloe Bi, Chris Marra, Chris McConnell, Christian Keller, Christophe Touret, Chunyang Wu, Corinne Wong, Cristian Canton Ferrer, Cyrus Nikolaidis, Damien Allonsius, Daniel Song, Danielle Pintz, Danny Livshits, Danny Wyatt, David Esiobu, Dhruv Choudhary, Dhruv Mahajan, Diego Garcia-Olano, Diego Perino, Dieuwke Hupkes, Egor Lakomkin, Ehab AlBadawy, Elina Lobanova, Emily Dinan, Eric Michael Smith, Filip Radenovic, Francisco Guzmán, Frank Zhang, Gabriel Synnaeve, Gabrielle Lee, Georgia Lewis Anderson, Govind Thattai, Graeme Nail, Gregoire Mialon, Guan Pang, Guillem Cucurell, Hailey Nguyen, Hannah Korevaar, Hu Xu, Hugo Touvron, Iliyan Zarov, Imanol Arrieta Ibarra, Isabel Kloumann, Ishan Misra, Ivan Evtimov, Jack Zhang, Jade Copet, Jaewon Lee, Jan Geffert, Jana Vranes, Jason Park, Jay Mahadeokar, Jeet Shah, Jelmer van der Linde, Jennifer Billock, Jenny Hong, Jenya Lee, Jeremy Fu, Jianfeng Chi, Jianyu Huang, Jiawen Liu, Jie Wang, Jiecao Yu, Joanna Bitton, Joe Spisak, Jongsoo Park, Joseph Rocca, Joshua Johnstun, Joshua Saxe, Junteng Jia, Kalyan Vasuden Alwala, Karthik Prasad, Kartikeya Upasani, Kate Plawiak, Ke Li, Kenneth Heafield, Kevin Stone, Khalid El-Arini, Krithika Iyer, Kshitiz Malik, Kuenley Chiu, Kunal Bhalla, Kushal Lakhotia, Lauren Rantala-Yeary, Laurens van der Maaten, Lawrence Chen, Liang Tan, Liz Jenkins, Louis Martin, Lovish Madaan, Lubo Malo, Lukas Blecher, Lukas Landzaat, Luke de Oliveira, Madeline Muzzi, Mahesh Pasupuleti, Mannat Singh, Manohar Paluri, Marcin Kardas, Maria Tsimpoukelli, Mathew Oldham, Mathieu Rita, Maya Pavlova, Melanie Kambadur, Mike Lewis, Min Si, Mitesh Kumar Singh, Mona Hassan, Naman Goyal, Narjes Torabi, Nikolay Bashlykov, Nikolay Bogoychev, Niladri Chatterji, Ning Zhang, Olivier Duchenne, Onur Çelebi, Patrick Alrassy, Pengchuan Zhang, Pengwei Li, Petar Vasic, Peter Weng, Prajjwal Bhargava, Pratik Dubal, Praveen Krishnan, Punit Singh Koura, Puxin Xu, Qing He, Qingxiao Dong, Ragavan Srinivasan, Raj Ganapathy, Ramon Calderer, Ricardo Silveira Cabral, Robert Stojnic, Roberta Raileanu, Rohan Maheswari, Rohit Girdhar, Rohit Patel, Romain Sauvestre, Ronnie Polidoro, Roshan Sumbaly, Ross Taylor, Ruan Silva, Rui Hou, Rui Wang, Saghar Hosseini, Sahana Chennabasappa, Sanjay Singh, Sean Bell, Seohyun Sonia Kim, Sergey Edunov, Shao-liang Nie, Sharan Narang, Sharath Rapparthi, Sheng Shen, Shengye Wan, Shruti Bhosale, Shun Zhang, Simon Vandenhende, Soumya Batra, Spencer Whitman, Sten Sootla, Stéphane Collot, Suchin Gururangan, Sydney Borodinsky, Tamar Herman, Tara Fowler, Tarek Sheasha, Thomas Georgiou, Thomas Scialom, Tobias Speckbacher, Todor Mihaylov, Tong Xiao, Ujjwal Karn, Vedanuj Goswami, Vibhor Gupta, Vignesh Ramanathan, Viktor Kerkez, Vincent Gonguet, Virginie Do, Vish Vogeti, Vitor Albiero, Vladan Petrovic, Weiwei Chu, Wenhan Xiong, Wenyin Fu, Whitney Meers, Xavier Martinet, Xiaodong Wang, Xiaofang Wang, Xiaoqing Ellen Tan, Xide Xia, Xinfeng Xie, Xuchao Jia, Xuewei Wang, Yaelle Goldschlag, Yashesh Gaur, Yasmine Babaei, Yi Wen, Yiwen Song, Yuchen Zhang, Yue Li, Yuning Mao, Zacharie Delpierre Coudert, Zheng Yan, Zhengxing Chen, Zoe Papakipos, Aaditya Singh, Aayushi Srivastava, Abha Jain, Adam Kelsey, Adam Shajnfeld, Adithya Gangidi, Adolfo Victoria, Ahuva Goldstand, Ajay Menon, Ajay Sharma, Alex Boesenberg, Alexei Baevski, Allie Feinstein, Amanda Kallet, Amit Sangani, Amos Teo, Anam Yunus, Andrei Lupu, Andres Alvarado, Andrew Caples, Andrew Gu, Andrew Ho, Andrew Poulton, Andrew Ryan, Ankit Ramchandani, Annie Dong, Annie Franco, Anuj Goyal, Aparajita Saraf, Arkabandhu Chowdhury, Ashley Gabriel, Ashwin Bharambe, Assaf Eisenman, Azadeh Yazdan, Beau James, Ben Maurer, Benjamin Leonhardi, Bernie Huang, Beth Loyd, Beto De Paola, Bhargavi Paranjape, Bing Liu, Bo Wu, Boyu Ni, Braden Hancock, Bram Wasti, Brandon Spence, Brani Stojkovic, Brian Gamido, Britt Montalvo, Carl Parker, Carly Burton, Catalina Mejia, Ce Liu, Changan Wang, Changkyu Kim, Chao Zhou, Chester Hu, Ching-Hsiang Chu, Chris Cai, Chris Tindal, Christoph Feichtenhofer, Cynthia Gao, Damon Civin, Dana Beaty, Daniel Kreymer, Daniel Li, David Adkins, David Xu, Davide Testuggine, Delia David, Devi Parikh, Diana Liskovich, Didem Foss, Dingkan Wang, Duc Le, Dustin Holland, Edward Dowling, Eissa Jamil, Elaine Montgomery, Eleonora Presani, Emily Hahn, Emily Wood, Eric-Tuan Le, Erik Brinkman, Esteban Arcaute, Evan Dunbar, Evan Smothers, Fei Sun, Felix Kreuk, Feng Tian, Filippos Kokkinos, Firat Ozgenel, Francesco Caggioni, Frank Kanayet, Frank Seide, Gabriela Medina Florez, Gabriella Schwarz, Gada Badeer, Georgia Sweeney,

- 1296 Gil Halpern, Grant Herman, Grigory Sizov, Guangyi, Zhang, Guna Lakshminarayanan, Hakan Inan,  
 1297 Hamid Shojanazeri, Han Zou, Hannah Wang, Hanwen Zha, Haroun Habeeb, Harrison Rudolph,  
 1298 Helen Suk, Henry Aspegren, Hunter Goldman, Hongyuan Zhan, Ibrahim Damlaj, Igor Molybog,  
 1299 Igor Tufanov, Ilias Leontiadis, Irina-Elena Veliche, Itai Gat, Jake Weissman, James Geboski, James  
 1300 Kohli, Janice Lam, Japhet Asher, Jean-Baptiste Gaya, Jeff Marcus, Jeff Tang, Jennifer Chan, Jenny  
 1301 Zhen, Jeremy Reizenstein, Jeremy Teboul, Jessica Zhong, Jian Jin, Jingyi Yang, Joe Cummings,  
 1302 Jon Carvill, Jon Shepard, Jonathan McPhie, Jonathan Torres, Josh Ginsburg, Junjie Wang, Kai  
 1303 Wu, Kam Hou U, Karan Saxena, Kartikay Khandelwal, Katayoun Zand, Kathy Matosich, Kaushik  
 1304 Veeraraghavan, Kelly Michelena, Keqian Li, Kiran Jagadeesh, Kun Huang, Kunal Chawla, Kyle  
 1305 Huang, Lailin Chen, Lakshya Garg, Lavender A, Leandro Silva, Lee Bell, Lei Zhang, Liangpeng  
 1306 Guo, Licheng Yu, Liron Moshkovich, Luca Wehrstedt, Madian Khabza, Manav Avalani, Manish  
 1307 Bhatt, Martynas Mankus, Matan Hasson, Matthew Lennie, Matthias Reso, Maxim Groshev, Maxim  
 1308 Naumov, Maya Lathi, Meghan Keneally, Miao Liu, Michael L. Seltzer, Michal Valko, Michelle  
 1309 Restrepo, Mihir Patel, Mik Vyatskov, Mikayel Samvelyan, Mike Clark, Mike Macey, Mike Wang,  
 1310 Miquel Jubert Hermoso, Mo Metanat, Mohammad Rastegari, Munish Bansal, Nandhini Santhanam,  
 1311 Natascha Parks, Natasha White, Navyata Bawa, Nayan Singhal, Nick Egebo, Nicolas Usunier,  
 1312 Nikhil Mehta, Nikolay Pavlovich Laptev, Ning Dong, Norman Cheng, Oleg Chernoguz, Olivia  
 1313 Hart, Omkar Salpekar, Ozlem Kalinli, Parkin Kent, Parth Parekh, Paul Saab, Pavan Balaji, Pedro  
 1314 Rittner, Philip Bontrager, Pierre Roux, Piotr Dollar, Polina Zvyagina, Prashant Ratanchandani,  
 1315 Pritish Yuvraj, Qian Liang, Rachad Alao, Rachel Rodriguez, Rafi Ayub, Raghotham Murthy,  
 1316 Raghu Nayani, Rahul Mitra, Rangaprabhu Parthasarathy, Raymond Li, Rebekkah Hogan, Robin  
 1317 Battey, Rocky Wang, Russ Howes, Ruty Rinott, Sachin Mehta, Sachin Siby, Sai Jayesh Bondu,  
 1318 Samyak Datta, Sara Chugh, Sara Hunt, Sargun Dhillon, Sasha Sidorov, Satadru Pan, Saurabh  
 1319 Mahajan, Saurabh Verma, Seiji Yamamoto, Sharadh Ramaswamy, Shaun Lindsay, Shaun Lindsay,  
 1320 Sheng Feng, Shenghao Lin, Shengxin Cindy Zha, Shishir Patil, Shiva Shankar, Shuqiang Zhang,  
 1321 Shuqiang Zhang, Sinong Wang, Sneha Agarwal, Soji Sajuyigbe, Soumith Chintala, Stephanie  
 1322 Max, Stephen Chen, Steve Kehoe, Steve Satterfield, Sudarshan Govindaprasad, Sumit Gupta,  
 1323 Summer Deng, Sungmin Cho, Sunny Virk, Suraj Subramanian, Sy Choudhury, Sydney Goldman,  
 1324 Tal Remez, Tamar Glaser, Tamara Best, Thilo Koehler, Thomas Robinson, Tianhe Li, Tianjun  
 1325 Zhang, Tim Matthews, Timothy Chou, Tzook Shaked, Varun Vontimitta, Victoria Ajayi, Victoria  
 1326 Montanez, Vijai Mohan, Vinay Satish Kumar, Vishal Mangla, Vlad Ionescu, Vlad Poenaru,  
 1327 Vlad Tiberiu Mihailescu, Vladimir Ivanov, Wei Li, Wenchen Wang, Wenwen Jiang, Wes Bouaziz,  
 1328 Will Constable, Xiaocheng Tang, Xiaoqian Wu, Xiaolan Wang, Xilun Wu, Xinbo Gao, Yaniv  
 1329 Kleinman, Yanjun Chen, Ye Hu, Ye Jia, Ye Qi, Yenda Li, Yilin Zhang, Ying Zhang, Yossi Adi,  
 1330 Youngjin Nam, Yu, Wang, Yu Zhao, Yuchen Hao, Yundi Qian, Yunlu Li, Yuzi He, Zach Rait,  
 1331 Zachary DeVito, Zef Rosnbrick, Zhaoduo Wen, Zhenyu Yang, Zhiwei Zhao, and Zhiyu Ma. The  
 1332 llama 3 herd of models, 2024. URL <https://arxiv.org/abs/2407.21783>.
- 1333 Zengyou He, Xiaofei Xu, and Shengchun Deng. k-anmi: A mutual information based clustering  
 1334 algorithm for categorical data. *Information Fusion*, 9(2):223–233, 2008.
- 1335 Jordan Hoffmann, Sebastian Borgeaud, Arthur Mensch, Elena Buchatskaya, Trevor Cai, Eliza  
 1336 Rutherford, Diego de Las Casas, Lisa Anne Hendricks, Johannes Welbl, Aidan Clark, Tom  
 1337 Hennigan, Eric Noland, Katie Millican, George van den Driessche, Bogdan Damoc, Aurelia Guy,  
 1338 Simon Osindero, Karen Simonyan, Erich Elsen, Jack W. Rae, Oriol Vinyals, and Laurent Sifre.  
 1339 Training compute-optimal large language models, 2022. URL <https://arxiv.org/abs/2203.15556>.
- 1340 Edward J. Hu, Yelong Shen, Phillip Wallis, Zeyuan Allen-Zhu, Yanzhi Li, Shean Wang, Lu Wang,  
 1341 and Weizhu Chen. Lora: Low-rank adaptation of large language models, 2021. URL <https://arxiv.org/abs/2106.09685>.
- 1342 Albert Q. Jiang, Alexandre Sablayrolles, Arthur Mensch, Chris Bamford, Devendra Singh Chaplot,  
 1343 Diego de las Casas, Florian Bressand, Gianna Lengyel, Guillaume Lample, Lucile Saulnier,  
 1344 L  lio Renard Lavaud, Marie-Anne Lachaux, Pierre Stock, Teven Le Scao, Thibaut Lavril, Thomas  
 1345 Wang, Timoth  e Lacroix, and William El Sayed. Mistral 7b, 2023. URL <https://arxiv.org/abs/2310.06825>.
- 1346 Jared Kaplan, Sam McCandlish, Tom Henighan, Tom B. Brown, Benjamin Chess, Rewon Child,  
 1347 Scott Gray, Alec Radford, Jeffrey Wu, and Dario Amodei. Scaling laws for neural language models,  
 1348 2020. URL <https://arxiv.org/abs/2001.08361>.

- Zeger F Knops, JB Antoine Maintz, Max A Viergever, and Josien PW Pluim. Normalized mutual information based registration using k-means clustering and shading correction. *Medical image analysis*, 10(3):432–439, 2006.
- Alexander Kraskov, Harald Stögbauer, and Peter Grassberger. Estimating mutual information. *Physical Review E—Statistical, Nonlinear, and Soft Matter Physics*, 69(6):066138, 2004.
- Alexander Kraskov, Harald Stögbauer, Ralph G Andrzejak, and Peter Grassberger. Hierarchical clustering using mutual information. *Europhysics Letters*, 70(2):278, 2005.
- Woosuk Kwon, Zhuohan Li, Siyuan Zhuang, Ying Sheng, Lianmin Zheng, Cody Hao Yu, Joseph E. Gonzalez, Hao Zhang, and Ion Stoica. Efficient memory management for large language model serving with pagedattention. In *Proceedings of the ACM SIGOPS 29th Symposium on Operating Systems Principles*, 2023.
- Katherine Lee, Daphne Ippolito, Andrew Nystrom, Chiyuan Zhang, Douglas Eck, Chris Callison-Burch, and Nicholas Carlini. Deduplicating Training Data Makes Language Models Better, March 2022.
- Kuan-Yun Lee. *New Information Inequalities with Applications to Statistics*. University of California, Berkeley, 2022.
- Kuan-Yun Lee and Thomas A Courtade. Linear models are most favorable among generalized linear models. In *2020 IEEE International Symposium on Information Theory (ISIT)*, pp. 1213–1218. IEEE, 2020.
- Kuan-Yun Lee and Thomas A Courtade. Minimax bounds for generalized pairwise comparisons. In *2021 International Conference on Machine Learning (ICML) Workshop on Information-Theoretic Methods for Rigorous, Responsible, and Reliable Machine Learning*, 2021.
- Stéphane G Mallat and Zhifeng Zhang. Matching pursuits with time-frequency dictionaries. *IEEE Transactions on signal processing*, 41(12):3397–3415, 1993.
- Mark EJ Newman, George T Cantwell, and Jean-Gabriel Young. Improved mutual information measure for clustering, classification, and community detection. *Physical Review E*, 101(4):042304, 2020.
- Qwen, :, An Yang, Baosong Yang, Beichen Zhang, Binyuan Hui, Bo Zheng, Bowen Yu, Chengyuan Li, Dayiheng Liu, Fei Huang, Haoran Wei, Huan Lin, Jian Yang, Jianhong Tu, Jianwei Zhang, Jianxin Yang, Jiaxi Yang, Jingren Zhou, Junyang Lin, Kai Dang, Keming Lu, Keqin Bao, Kexin Yang, Le Yu, Mei Li, Mingfeng Xue, Pei Zhang, Qin Zhu, Rui Men, Runji Lin, Tianhao Li, Tianyi Tang, Tingyu Xia, Xingzhang Ren, Xuancheng Ren, Yang Fan, Yang Su, Yichang Zhang, Yu Wan, Yuqiong Liu, Zeyu Cui, Zhenru Zhang, and Zihan Qiu. Qwen2.5 technical report, 2025. URL <https://arxiv.org/abs/2412.15115>.
- Aditya Sanghi. Info3d: Representation learning on 3d objects using mutual information maximization and contrastive learning. In *Computer Vision—ECCV 2020: 16th European Conference, Glasgow, UK, August 23–28, 2020, Proceedings, Part XXIX 16*, pp. 626–642. Springer, 2020.
- Ozan Sener and Silvio Savarese. Active learning for convolutional neural networks: A core-set approach, June 2018.
- Burr Settles. Active learning literature survey. Technical Report CS-TR-1648, University of Wisconsin–Madison, 2009. URL <https://burrsettles.com/pub/settles.activelearning.pdf>.
- Masashi Sugiyama, Gang Niu, Makoto Yamada, Manabu Kimura, and Hirotaka Hachiya. Information-maximization clustering based on squared-loss mutual information. *Neural Computation*, 26(1): 84–131, 2014.
- Mirac Suzgun, Nathan Scales, Nathanael Schärli, Sebastian Gehrmann, Yi Tay, Hyung Won Chung, Aakanksha Chowdhery, Quoc V. Le, Ed H. Chi, Denny Zhou, and Jason Wei. Challenging big-bench tasks and whether chain-of-thought can solve them. *arXiv preprint arXiv:2210.09261*, 2022. URL <https://arxiv.org/abs/2210.09261>.



- Rohan Taori, Ishaan Gulrajani, Tianyi Zhang, Yann Dubois, Xuechen Li, Carlos Guestrin, Percy Liang, and Tatsunori B. Hashimoto. Stanford alpaca: An instruction-following llama model. [https://github.com/tatsu-lab/stanford\\_alpaca](https://github.com/tatsu-lab/stanford_alpaca), 2023a.
- Rohan Taori, Ishaan Gulrajani, Tianyi Zhang, Yann Dubois, Xuechen Li, Carlos Guestrin, Percy Liang, and Tatsunori B Hashimoto. Alpaca: A strong, replicable instruction-following model. *Stanford Center for Research on Foundation Models*. <https://crfm.stanford.edu/2023/03/13/alpaca.html>, 3(6):7, 2023b.
- Yizhong Wang, Yeganeh Kordi, Swaroop Mishra, Alisa Liu, Noah A. Smith, Daniel Khashabi, and Hannaneh Hajishirzi. Self-Instruct: Aligning Language Model with Self Generated Instructions, December 2022.
- Benjamin Warner, Antoine Chaffin, Benjamin Clavié, Orion Weller, Oskar Hallström, Said Taghadouini, Alexis Gallagher, Raja Biswas, Faisal Ladhak, Tom Aarsen, et al. Smarter, better, faster, longer: A modern bidirectional encoder for fast, memory efficient, and long context finetuning and inference. *arXiv preprint arXiv:2412.13663*, 2024.
- Max A Woodbury. *Inverting modified matrices*. Department of Statistics, Princeton University, 1950.
- Mengzhou Xia, Sadhika Malladi, Suchin Gururangan, Sanjeev Arora, and Danqi Chen. Less: Selecting influential data for targeted instruction tuning. *arXiv preprint arXiv:2402.04333*, 2024. URL <https://arxiv.org/abs/2402.04333>.
- Sang Michael Xie, Shibani Santurkar, Tengyu Ma, and Percy Liang. Data selection for language models via importance resampling. In *NeurIPS*, 2023. URL <https://arxiv.org/abs/2302.03169>.
- An Yang, Anfeng Li, Baosong Yang, Beichen Zhang, Binyuan Hui, Bo Zheng, Bowen Yu, Chang Gao, Chengen Huang, Chenxu Lv, et al. Qwen3 technical report. *arXiv preprint arXiv:2505.09388*, 2025.
- Yan Zhang, Ruidan He, Zuozhu Liu, Kwan Hui Lim, and Lidong Bing. An unsupervised sentence embedding method by mutual information maximization. *arXiv preprint arXiv:2009.12061*, 2020.
- Hao Zhao, Maksym Andriushchenko, Francesco Croce, and Nicolas Flammarion. Long is more for alignment: A simple but tough-to-beat baseline for instruction fine-tuning. *arXiv preprint arXiv:2402.04833*, 2024.
- Lianmin Zheng, Wei-Lin Chiang, Ying Sheng, Siyuan Zhuang, Zhanghao Wu, Yonghao Zhuang, Zi Lin, Zhuohan Li, Dacheng Li, Eric Xing, et al. Judging llm-as-a-judge with mt-bench and chatbot arena. *Advances in Neural Information Processing Systems*, 36:46595–46623, 2023a.
- Lianmin Zheng, Wei-Lin Chiang, Ying Sheng, Siyuan Zhuang, Zhanghao Wu, Yonghao Zhuang, Zi Lin, Zhuohan Li, Dacheng Li, Eric P. Xing, Hao Zhang, Joseph E. Gonzalez, and Ion Stoica. Judging llm-as-a-judge with mt-bench and chatbot arena, 2023b. URL <https://arxiv.org/abs/2306.05685>.
- Chunting Zhou, Pengfei Liu, Puxin Xu, Srini Iyer, Jiao Sun, Yuning Mao, Xuezhe Ma, Avia Efrat, Ping Yu, Lili Yu, Susan Zhang, Gargi Ghosh, Mike Lewis, Luke Zettlemoyer, and Omer Levy. Lima: Less is more for alignment, 2023.
